# Supplementary material for: Tetrathiafulvalene and π-extended tetrathiafulvalene pillar[5]arene conjugates: synthesis, electrochemistry and host–guest properties
Source: Royal Society of Chemistry journal article supplement (doi:10.1039/d3nj01025b), 2023-01-01
Supplement: d3nj01025b1.pdf [file d3nj01025b1.pdf]

## Supplementary Information

### **Tetrathiafulvalene and $\pi$ -extended tetrathiafulvalene pillar[5]arene conjugates: synthesis, electrochemistry and host-guest properties**

Maksym Dekhtiarenko,<sup>a,b</sup> Gabriel Mengheres,<sup>a</sup> Eric Levillain,<sup>a</sup> Zoia Voitenko,<sup>b</sup> Iwona Nierengarten,<sup>c</sup> Jean-François Nierengarten,<sup>\*c</sup> Sébastien Goeb<sup>\*a</sup> and Marc Sallé<sup>\*a</sup>

## Table of Contents

|                                          |     |
|------------------------------------------|-----|
| Synthesis                                | S3  |
| NMR, IR, UV-Vis and mass spectra         | S4  |
| Thin layer cyclic voltammetry results    | S36 |
| <sup>1</sup> H NMR titration experiments | S39 |
| Calculated structures                    | S50 |

## SYNTHESIS

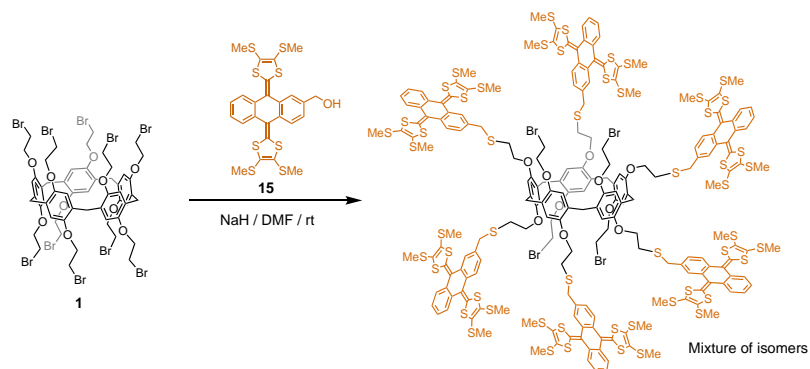

**Scheme S1.** Reaction of pillar[5]arene **1** with exTTF derivative **15** that did not lead to more than six substitutions.

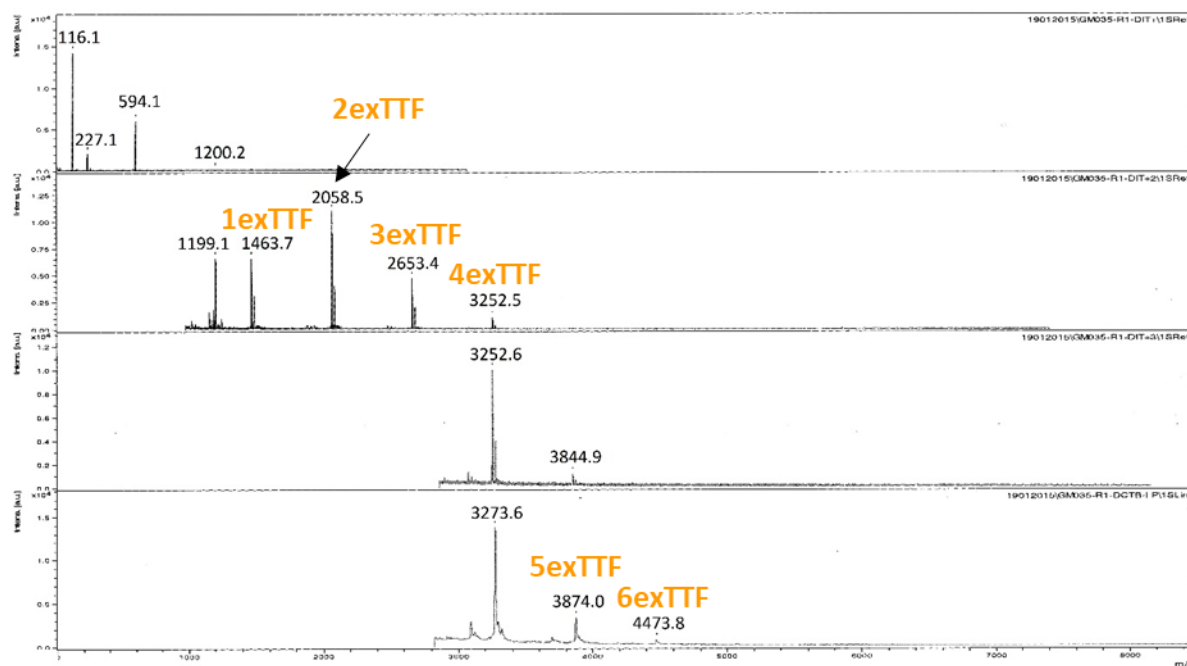

**Figure S1.** Mass spectrum corresponding to the synthesis depicted in scheme S1.

## NMR, IR, UV-Vis and mass spectra

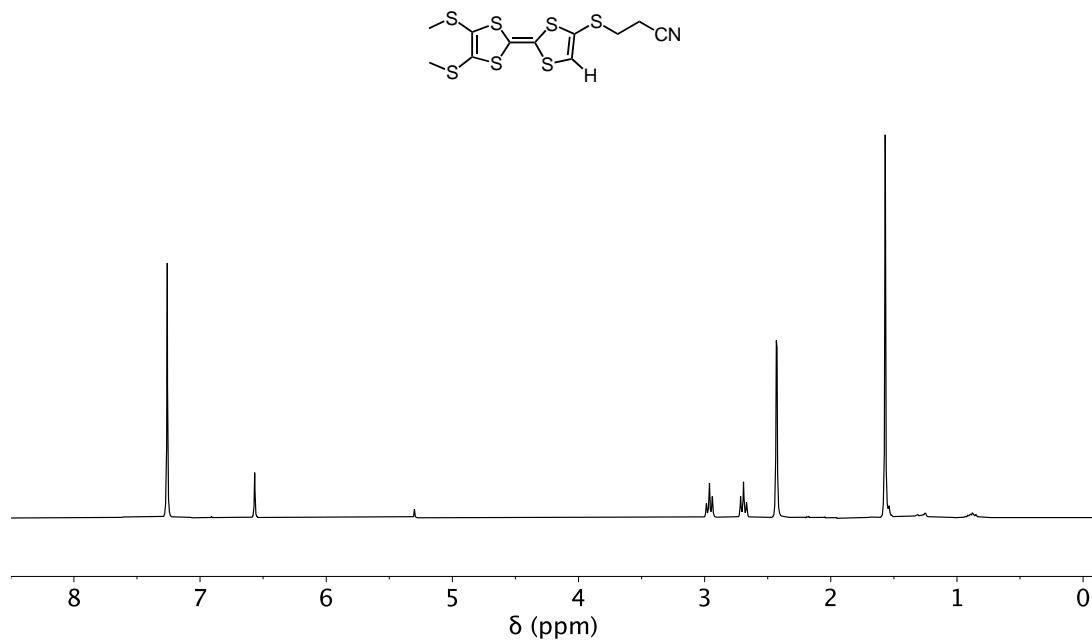

**Figure S2.** <sup>1</sup>H NMR spectrum of compound **2a** (300 MHz, CDCl<sub>3</sub>, 298K).

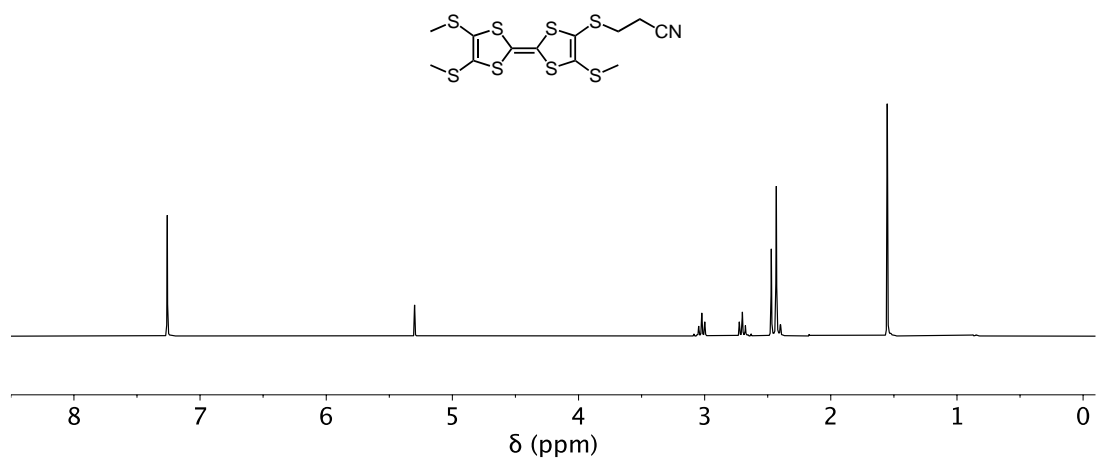

**Figure S3.** <sup>1</sup>H NMR spectrum of compound **2b** (300 MHz, CDCl<sub>3</sub>, 298K).

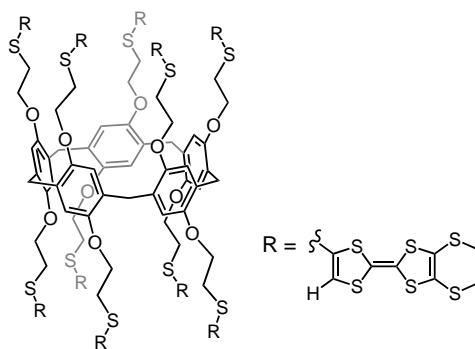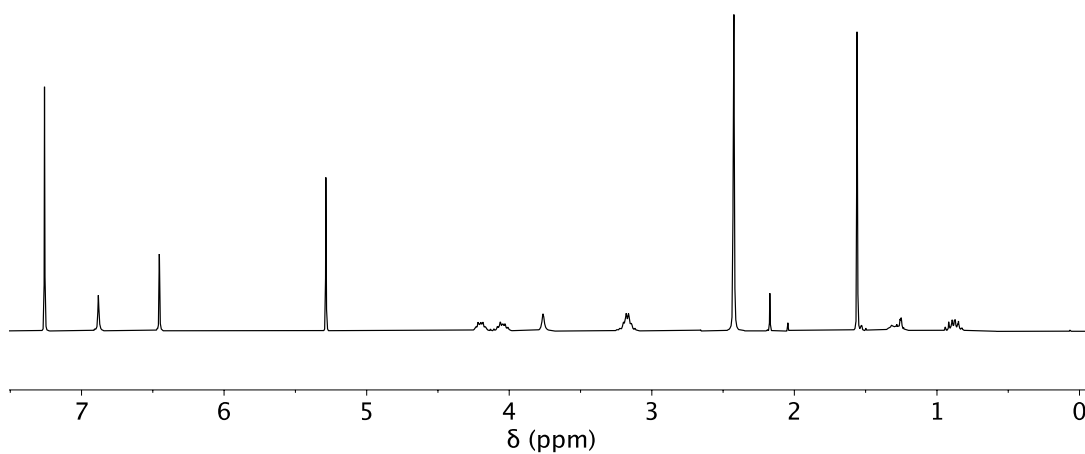

**Figure S4a.** <sup>1</sup>H NMR spectrum of compound **3a** (300 MHz, CDCl<sub>3</sub>, 298K).

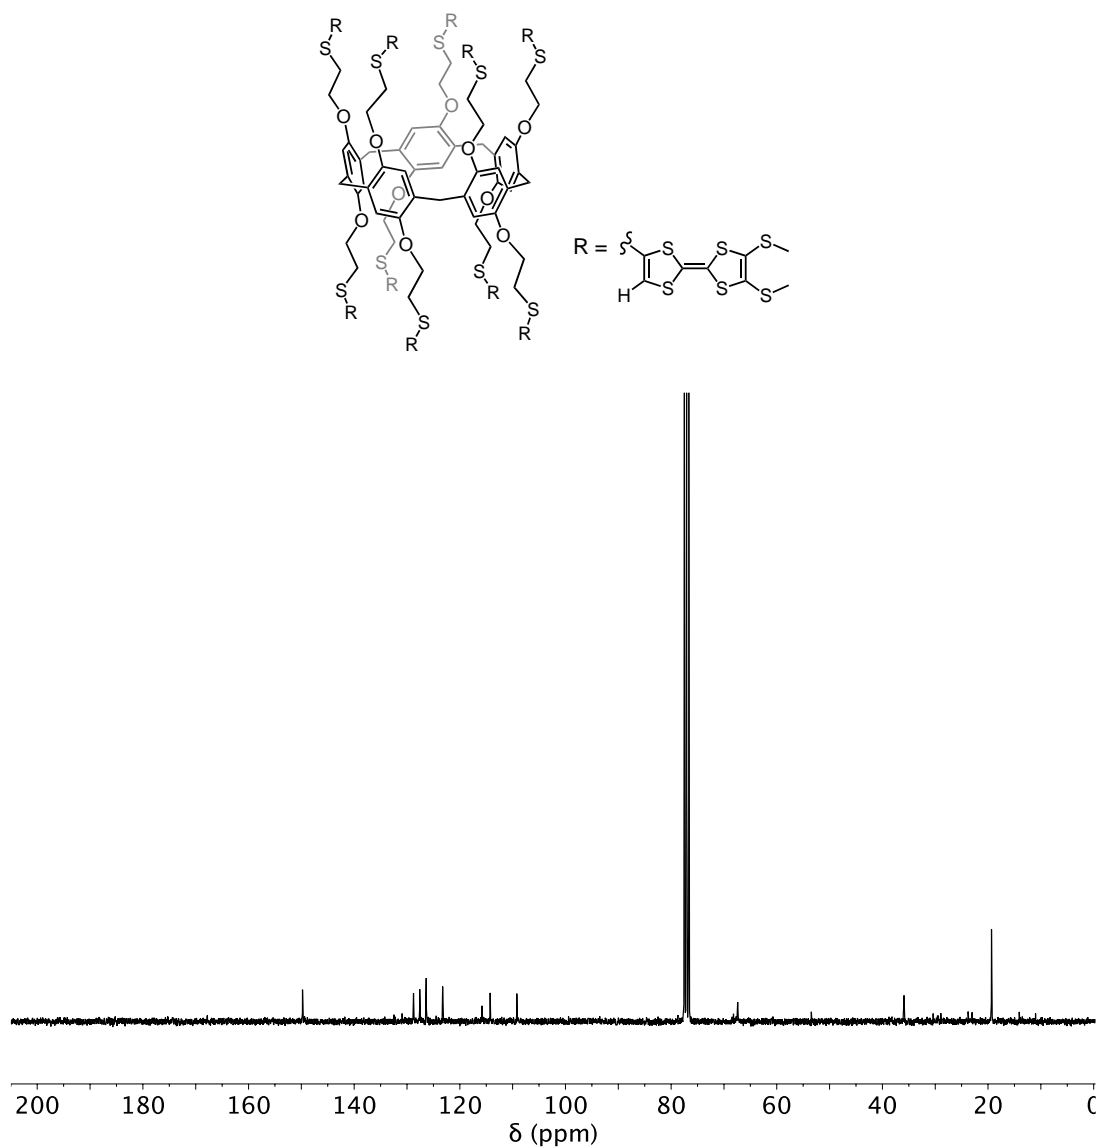

**Figure S4b.**  $^{13}\text{C}$  NMR spectrum of compound **3a** (75 MHz,  $\text{CDCl}_3$ , 298K).

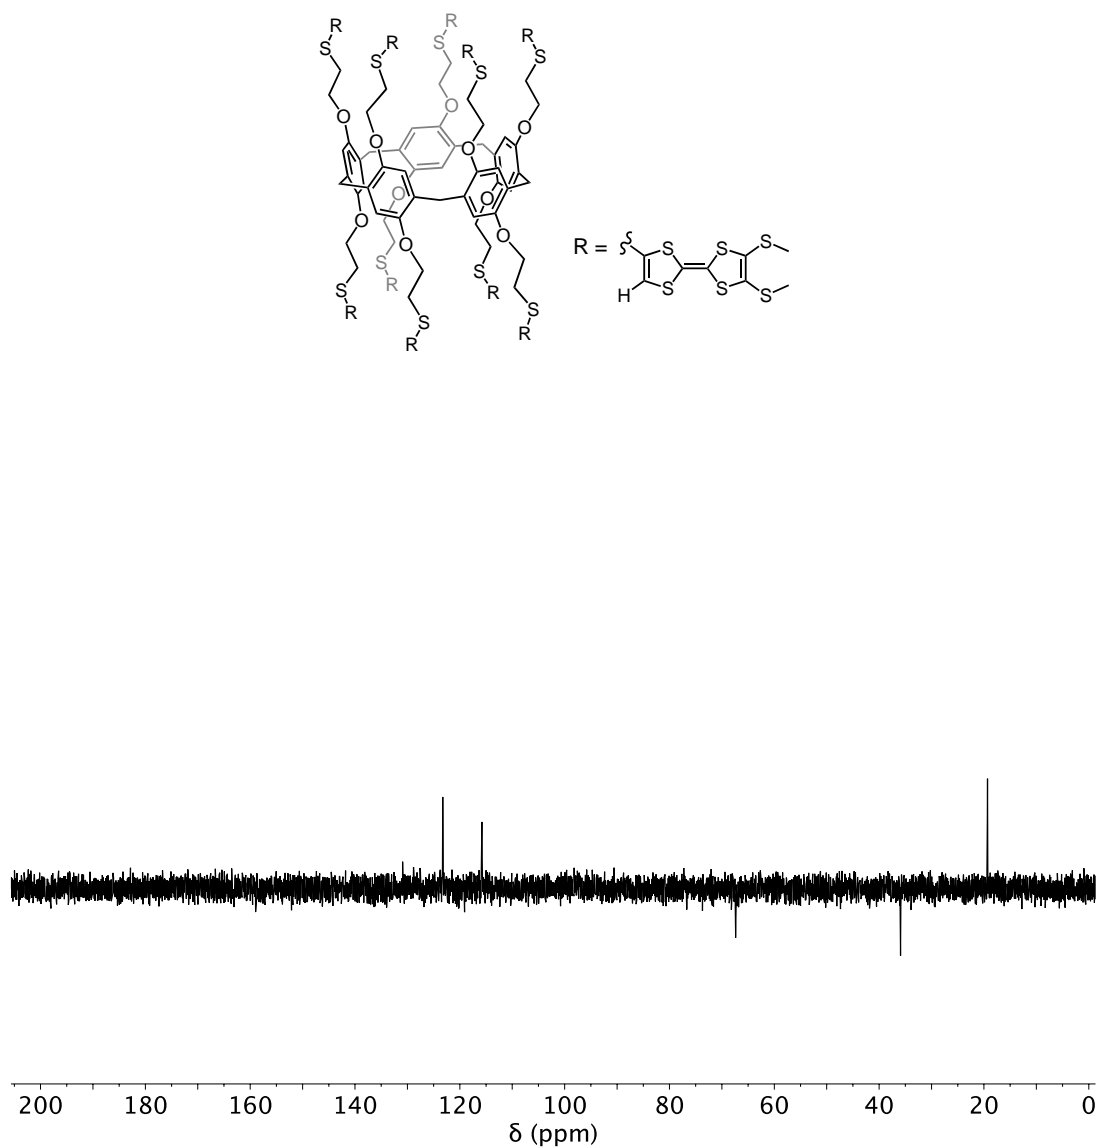

**Figure S4c.** DEPT spectrum of compound **3a** (75 MHz,  $\text{CDCl}_3$ , 298K).



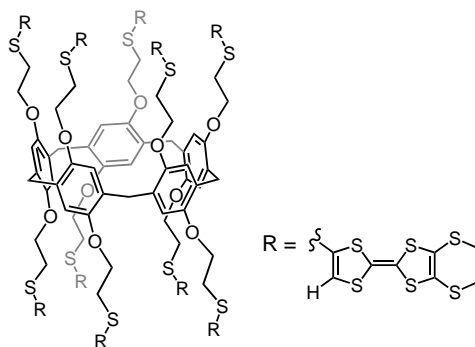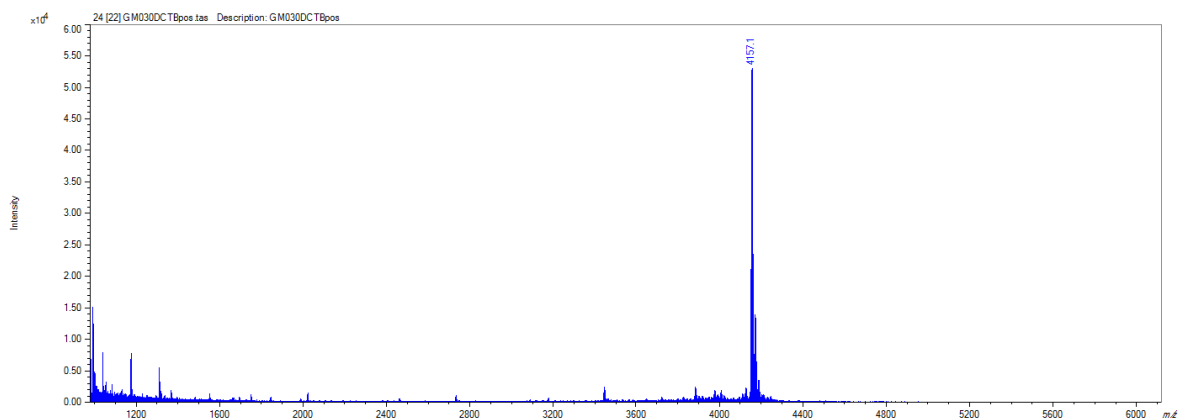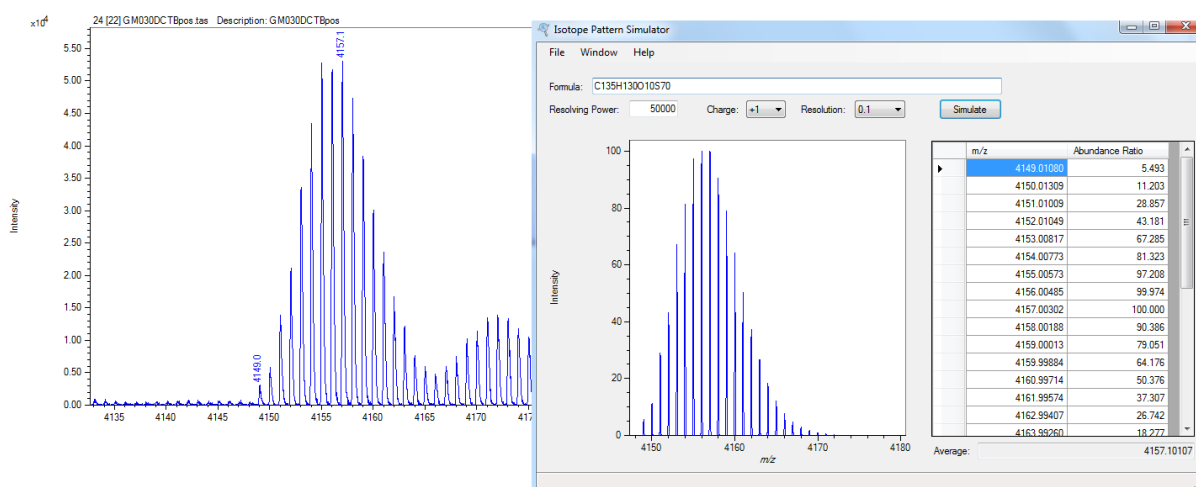

**Figure S4d.** MALDI-TOF mass spectrum of compound **3a**.

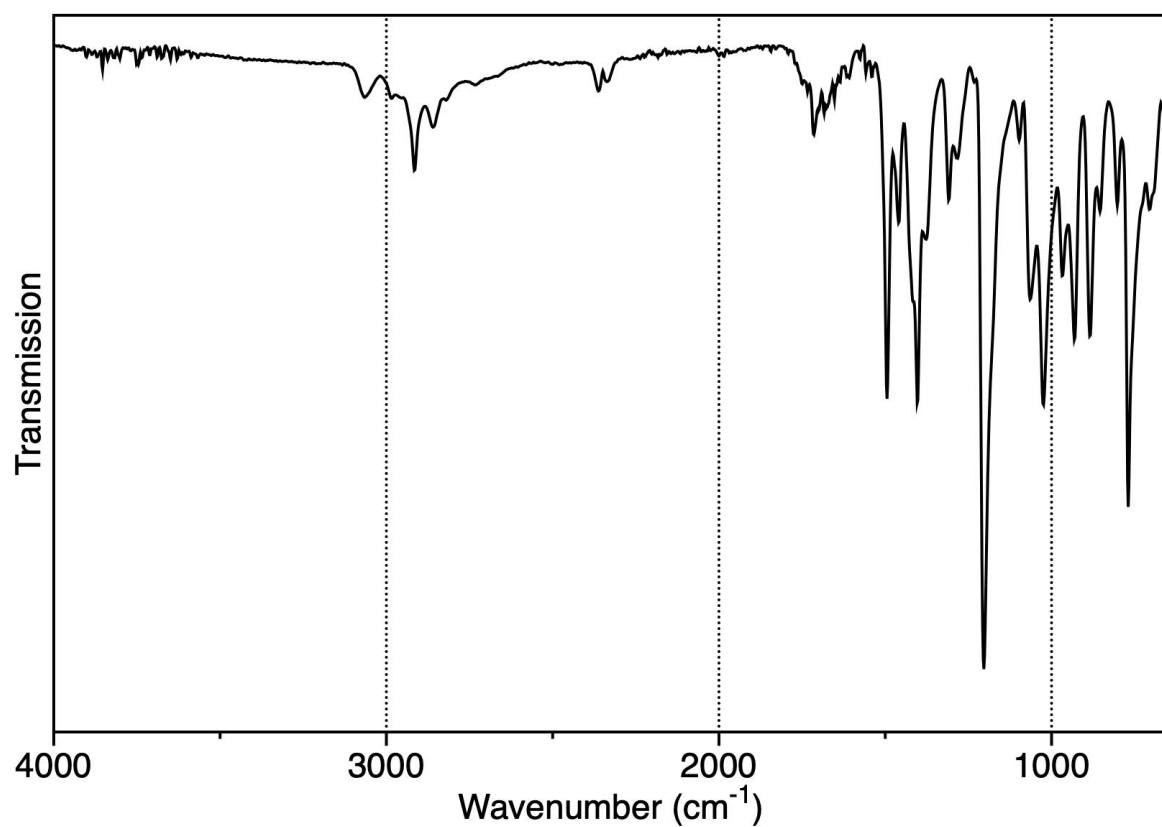

**Figure S4e.** IR spectrum of compound **3a**.

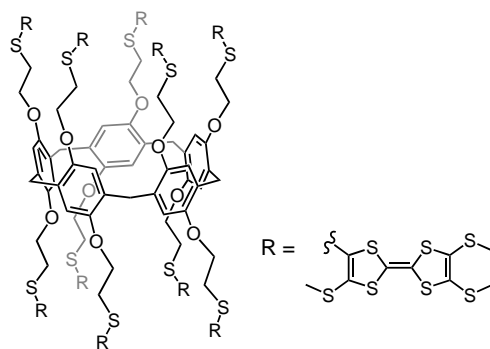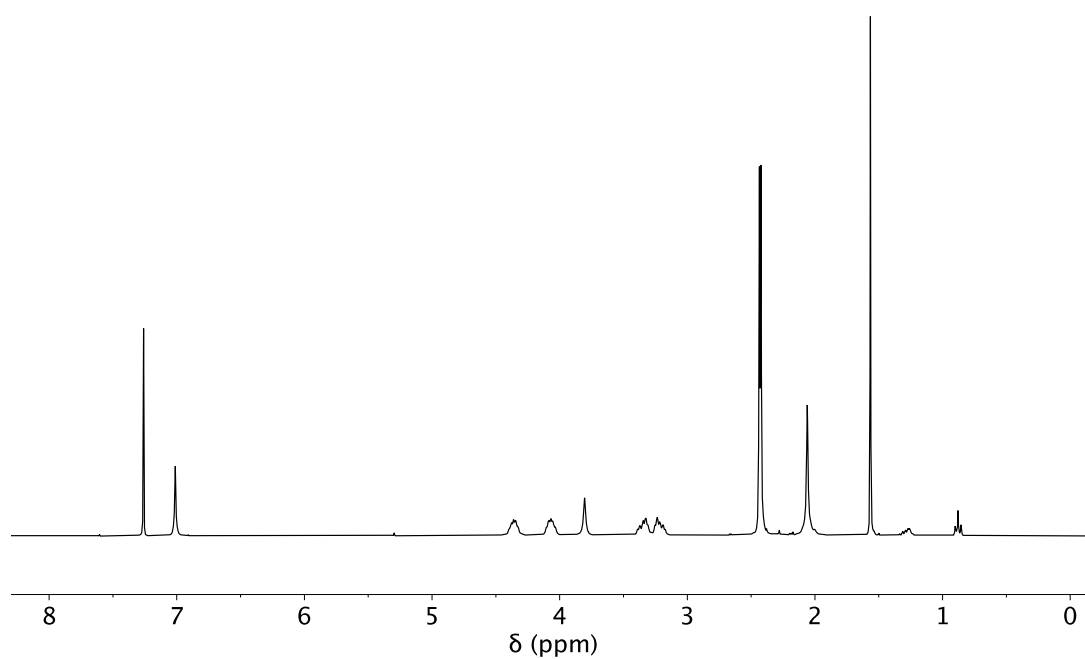

**Figure S5a.**  $^1\text{H}$  NMR spectrum of compound **3b** (300 MHz,  $\text{CDCl}_3$ , 298K).

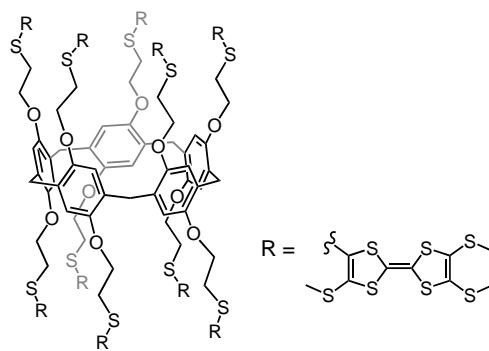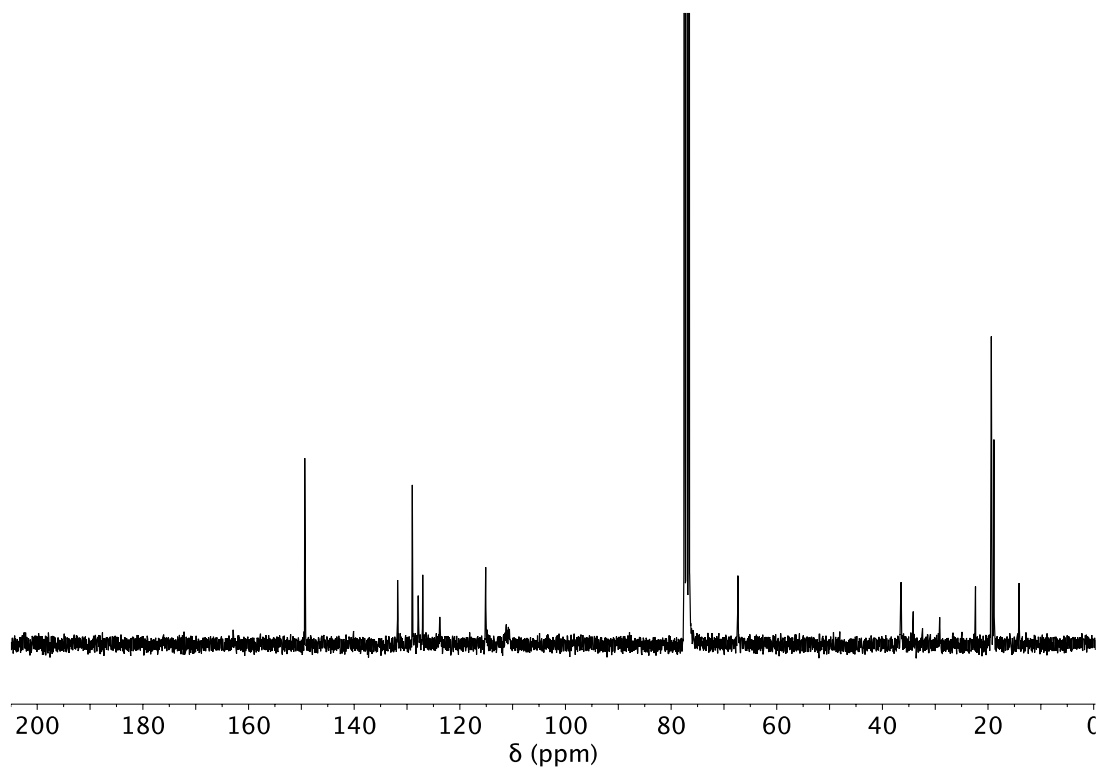

**Figure S5b.** <sup>13</sup>C NMR spectrum of compound **3b** (75 MHz, CDCl<sub>3</sub>, 298K).

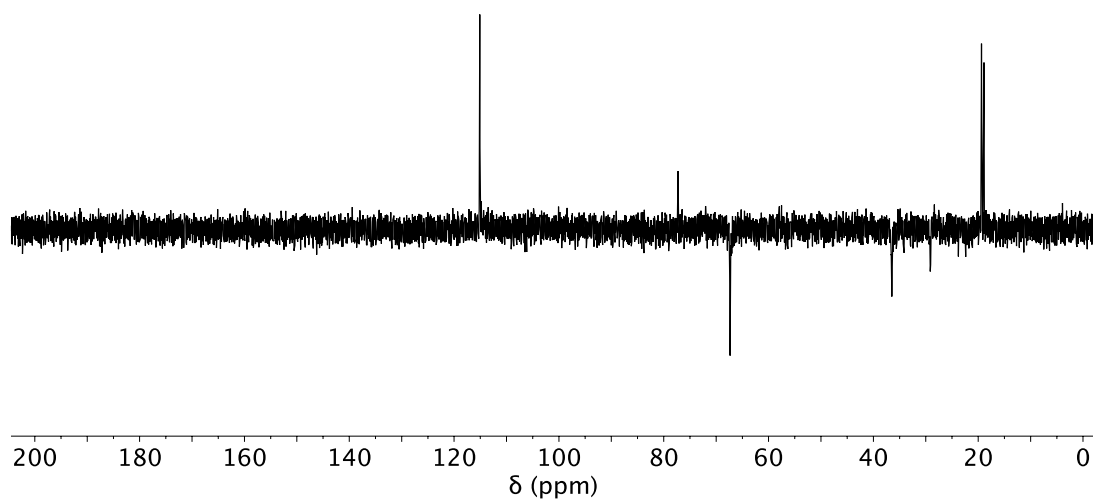

**Figure S5c.** DEPT spectrum of compound **3b** (75 MHz,  $\text{CDCl}_3$ , 298K).

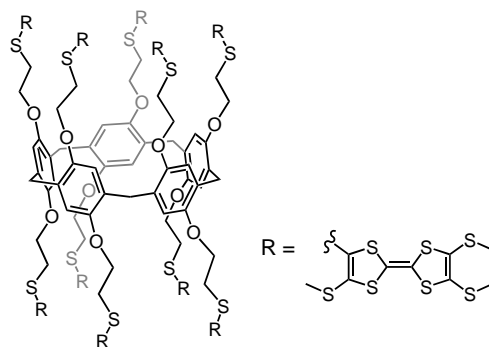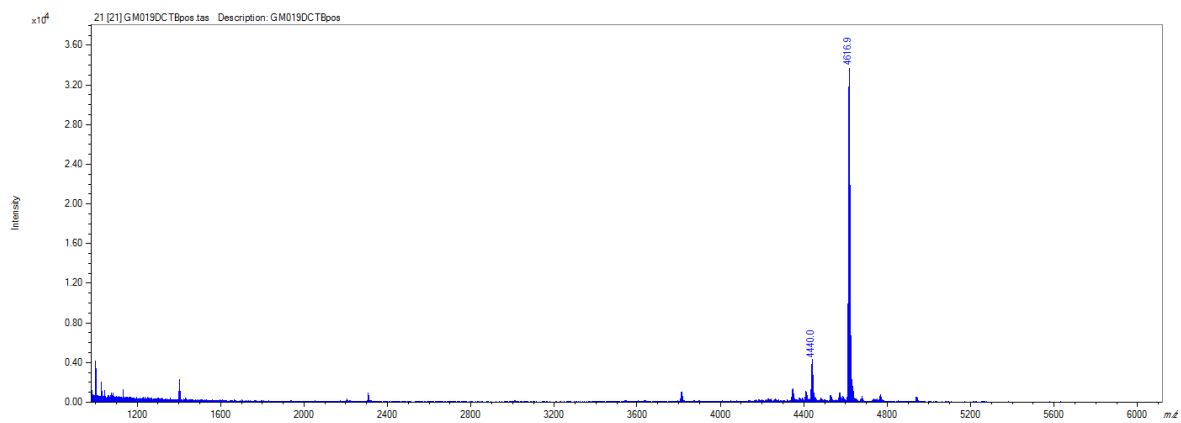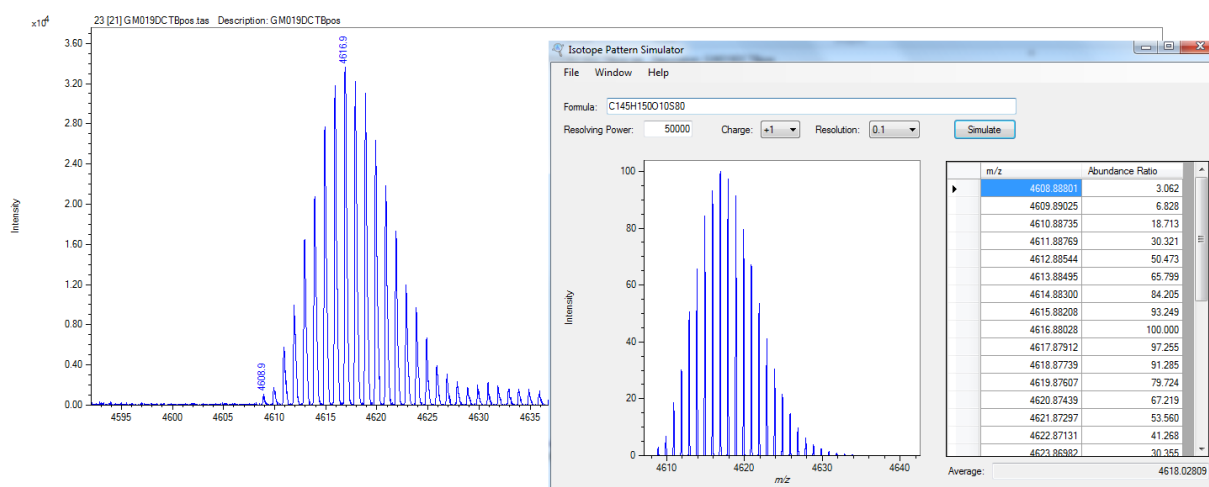

**Figure S5d.** MALDI-TOF mass spectrum of compound **3b**.

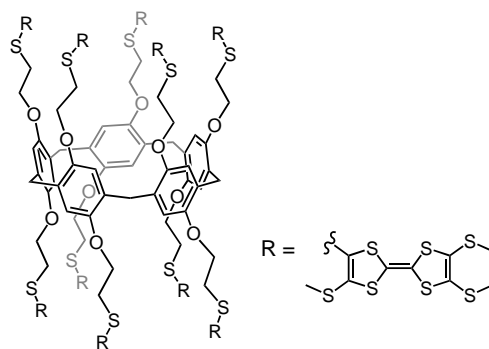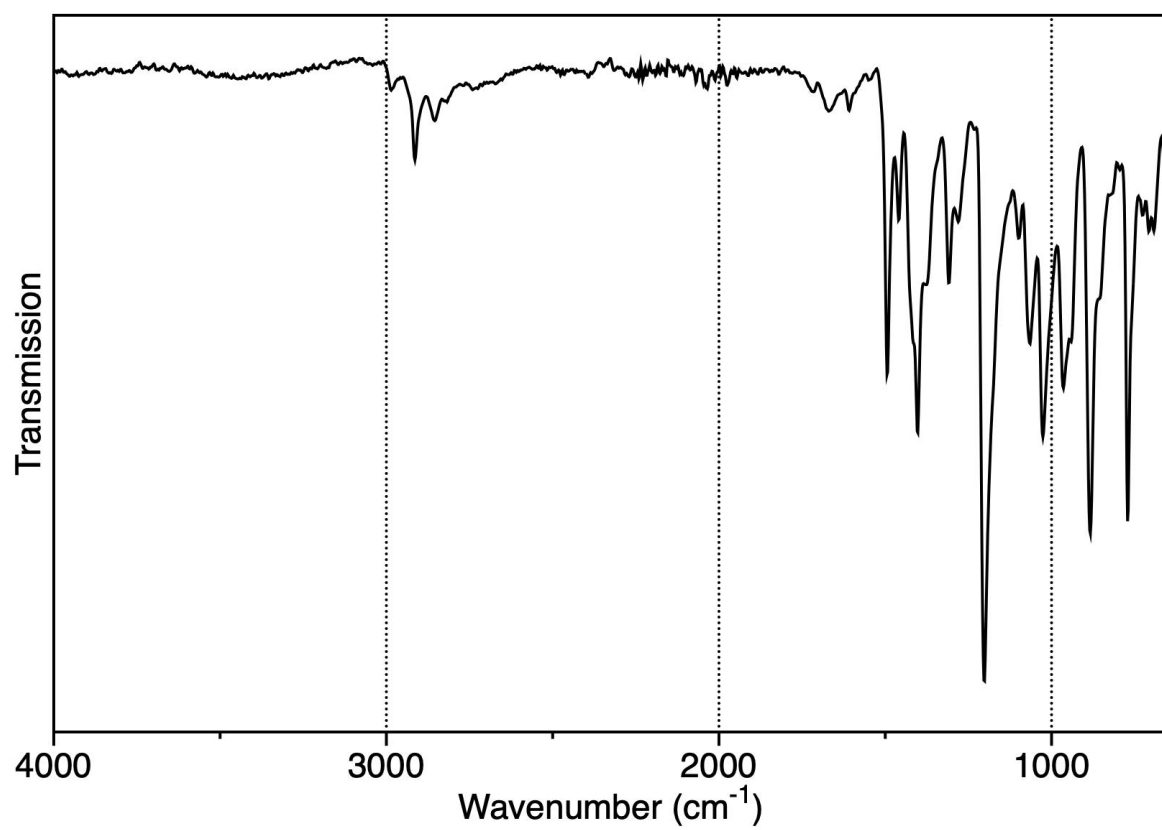

**Figure S5e.** IR spectrum of compound **3b**.

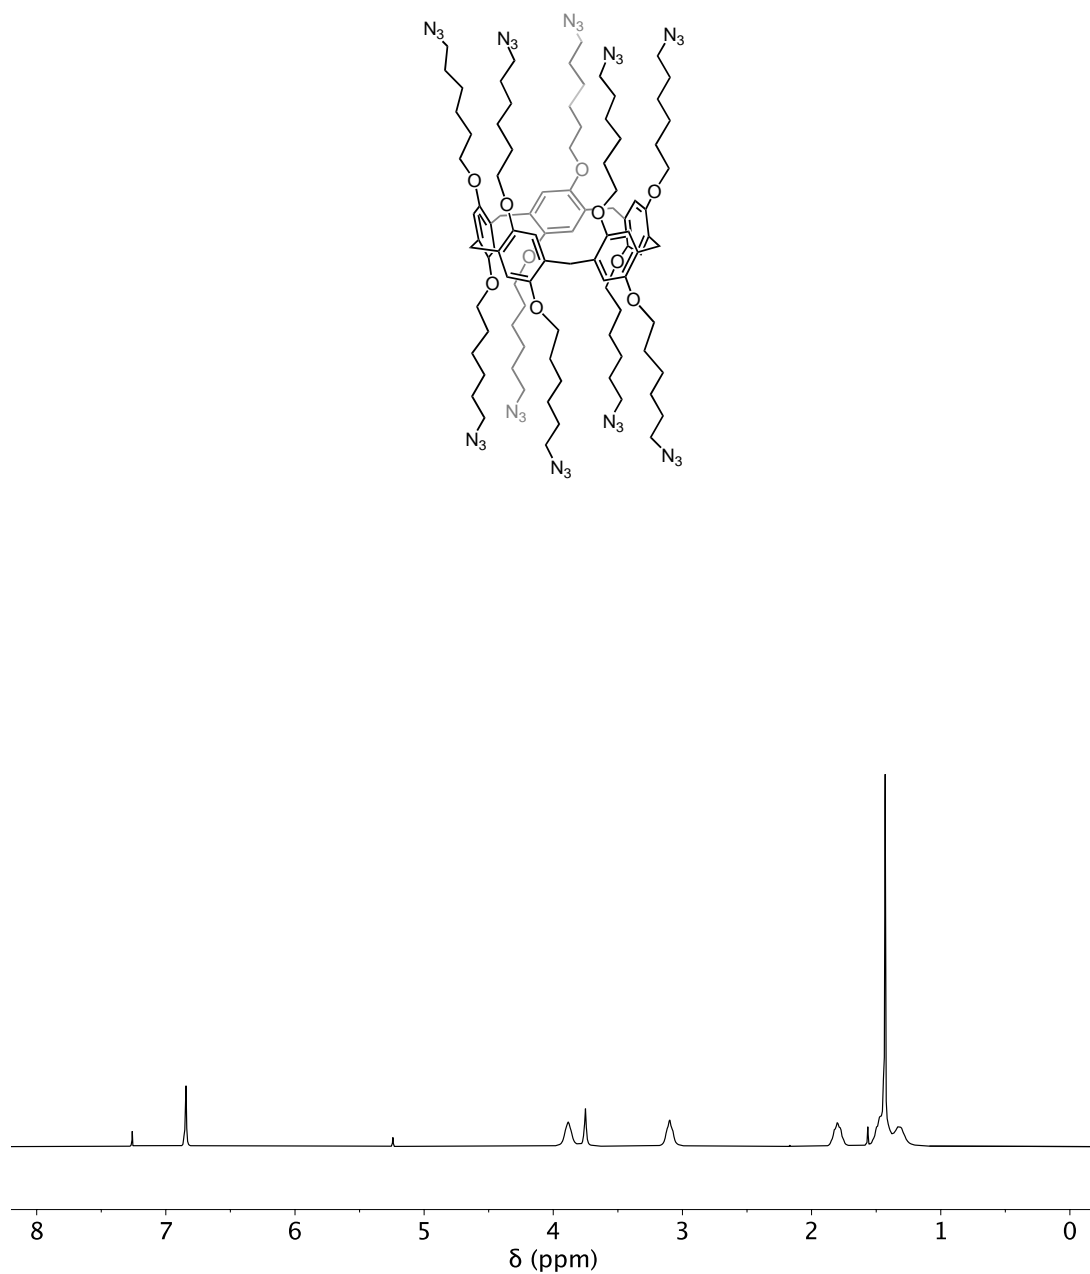

**Figure S6a.** <sup>1</sup>H NMR spectrum of compound **5** (300 MHz, CDCl<sub>3</sub>, 298K).



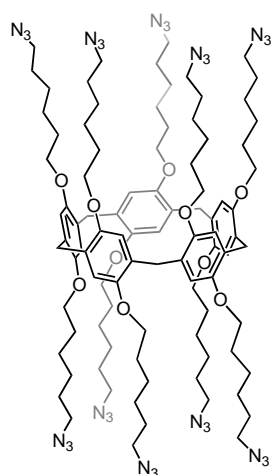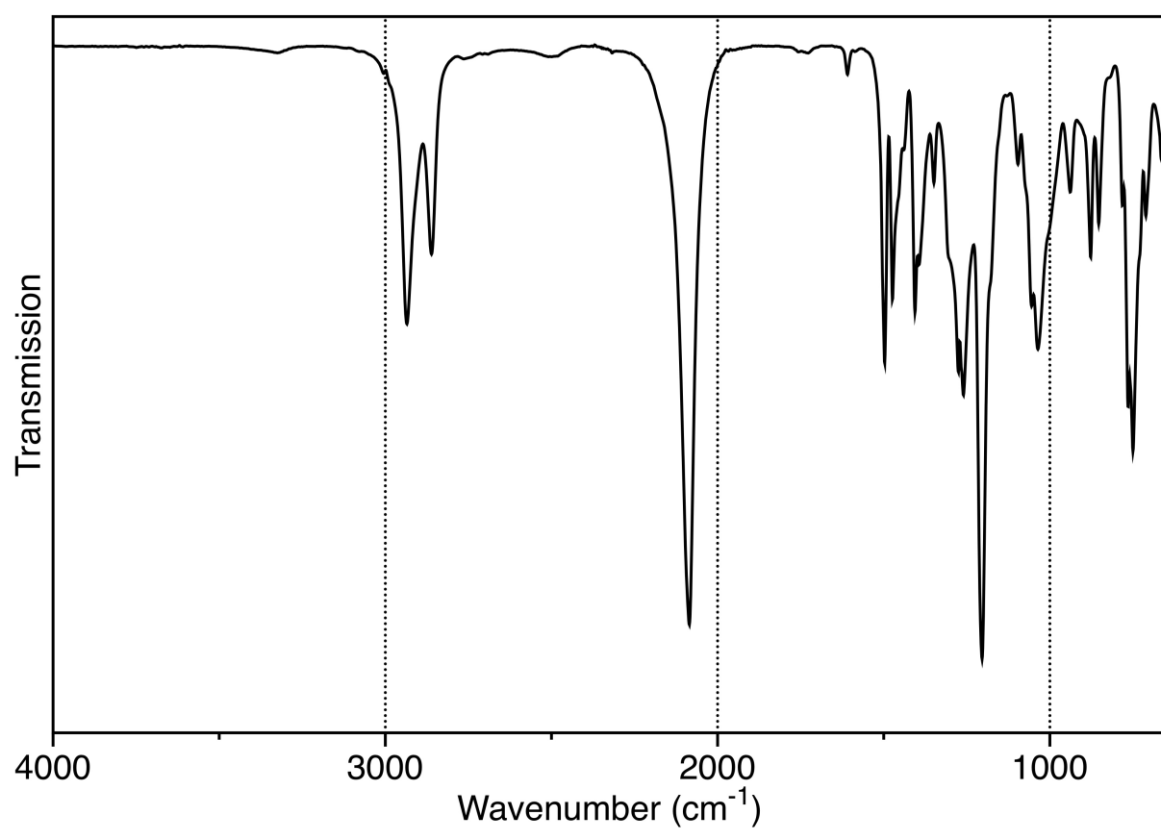

**Figure S6b.** IR spectrum of compound **5**.

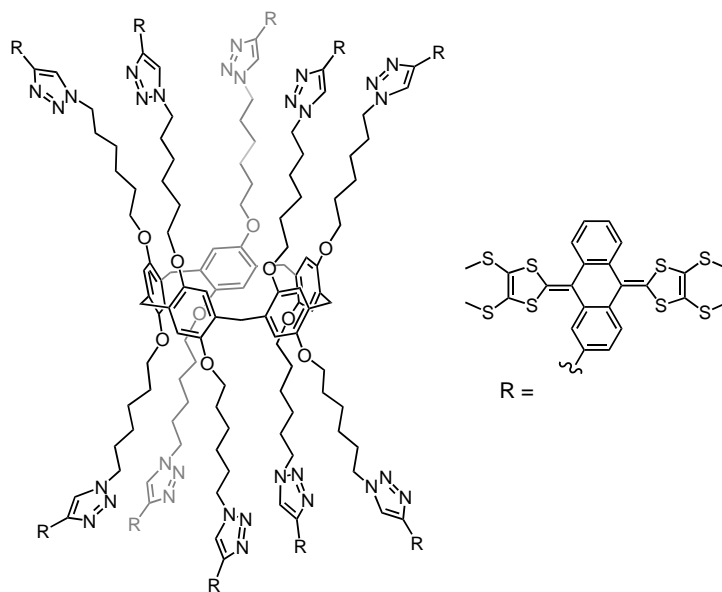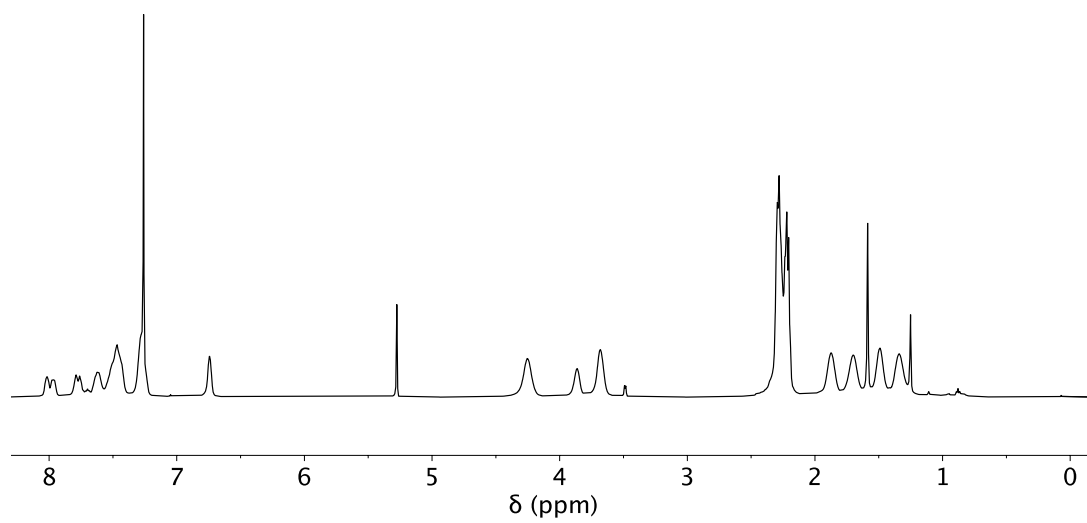

**Figure S7a.** <sup>1</sup>H NMR spectrum of compound 7 (500 MHz, CDCl<sub>3</sub>, 298K).

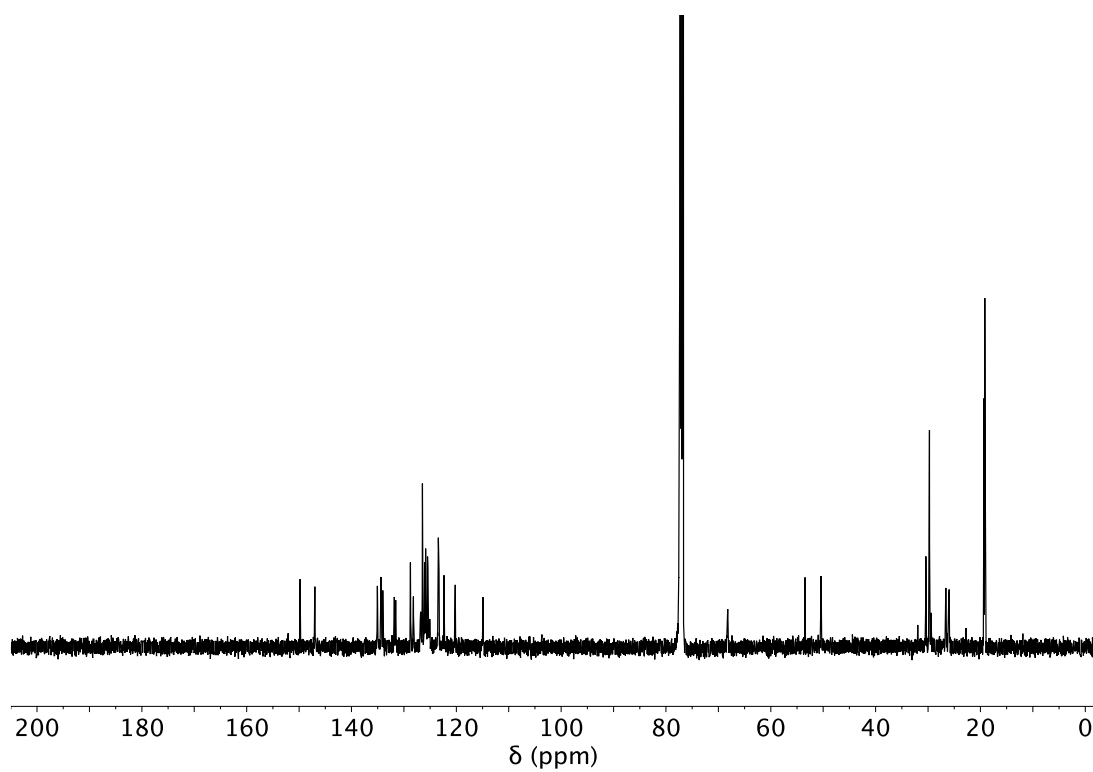

**Figure S7b.**  $^{13}\text{C}$  NMR spectrum of compound **7** (125 MHz,  $\text{CDCl}_3$ , 298K).

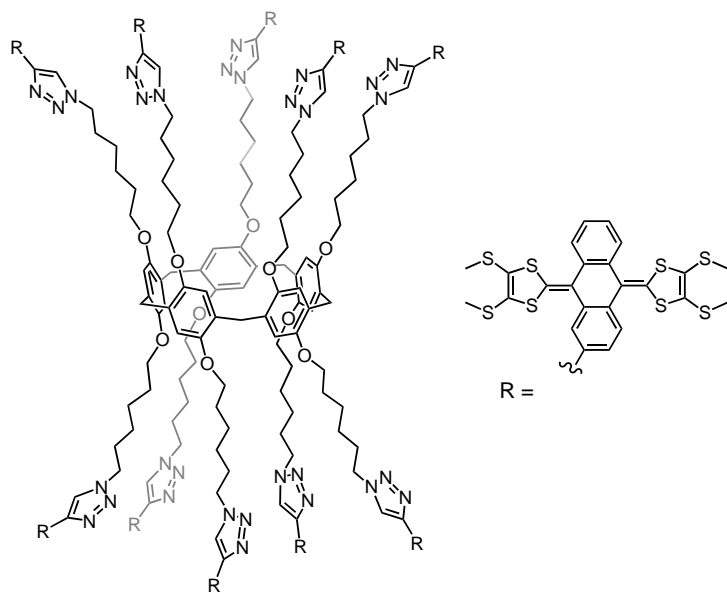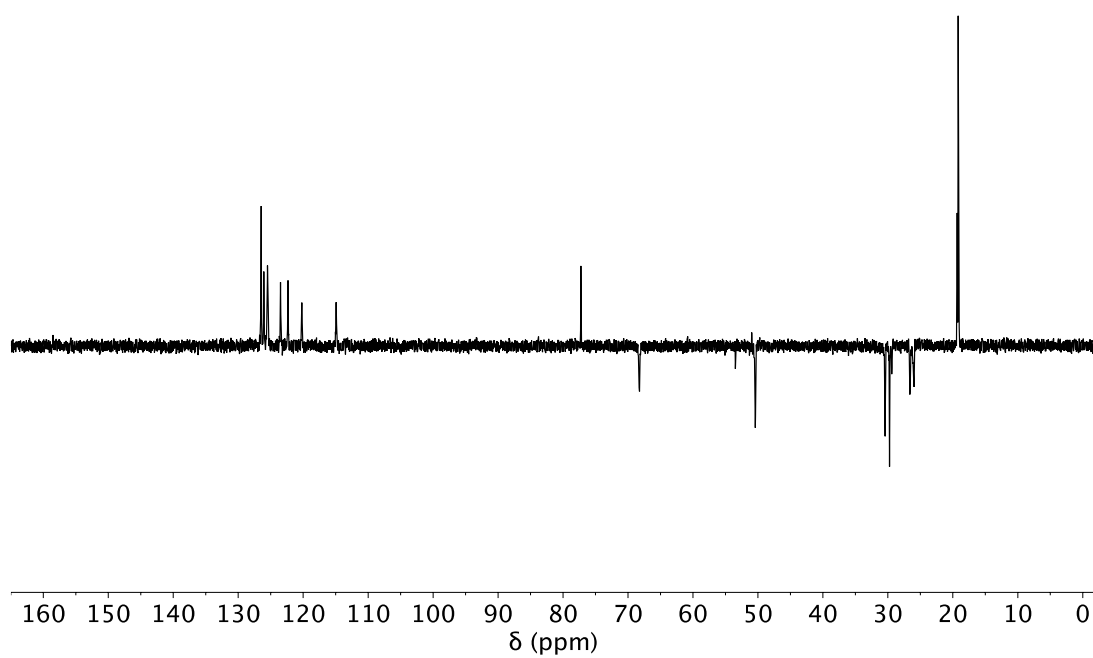

**Figure S7c.** DEPT spectrum of compound **7** (125 MHz,  $\text{CDCl}_3$ , 298K).

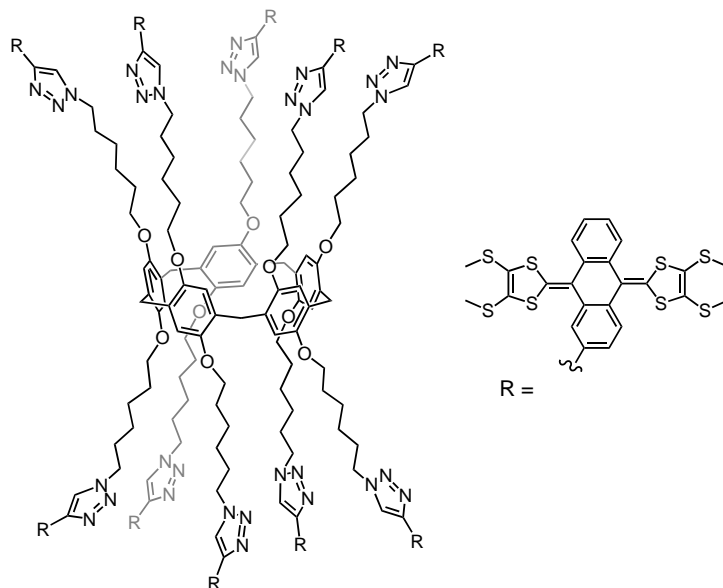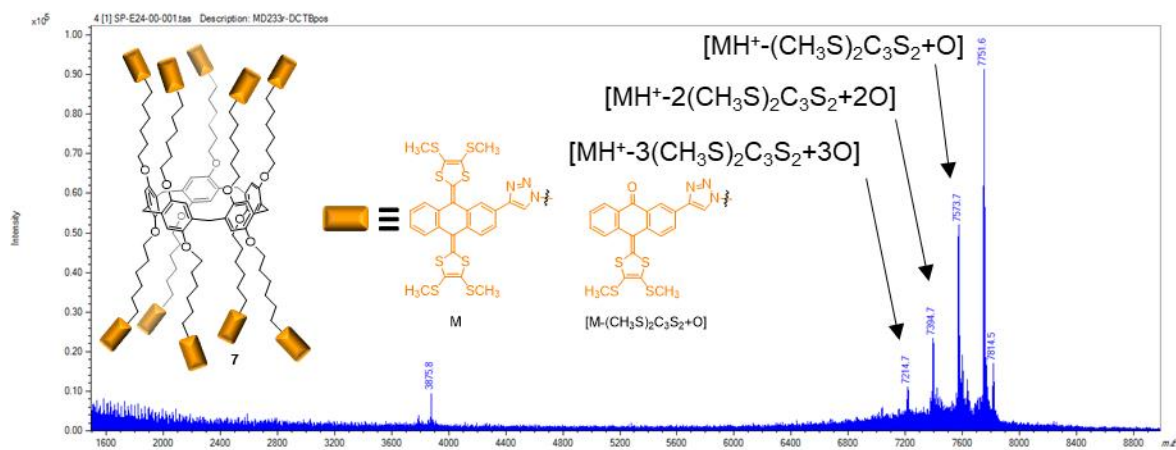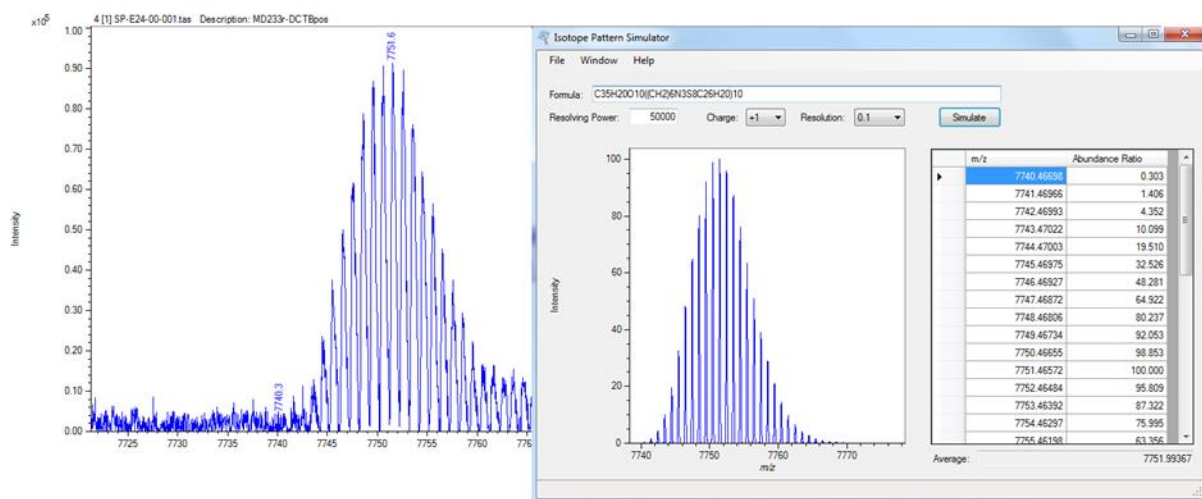

Figure S7d. MALDI-TOF mass spectrum of compound 7.

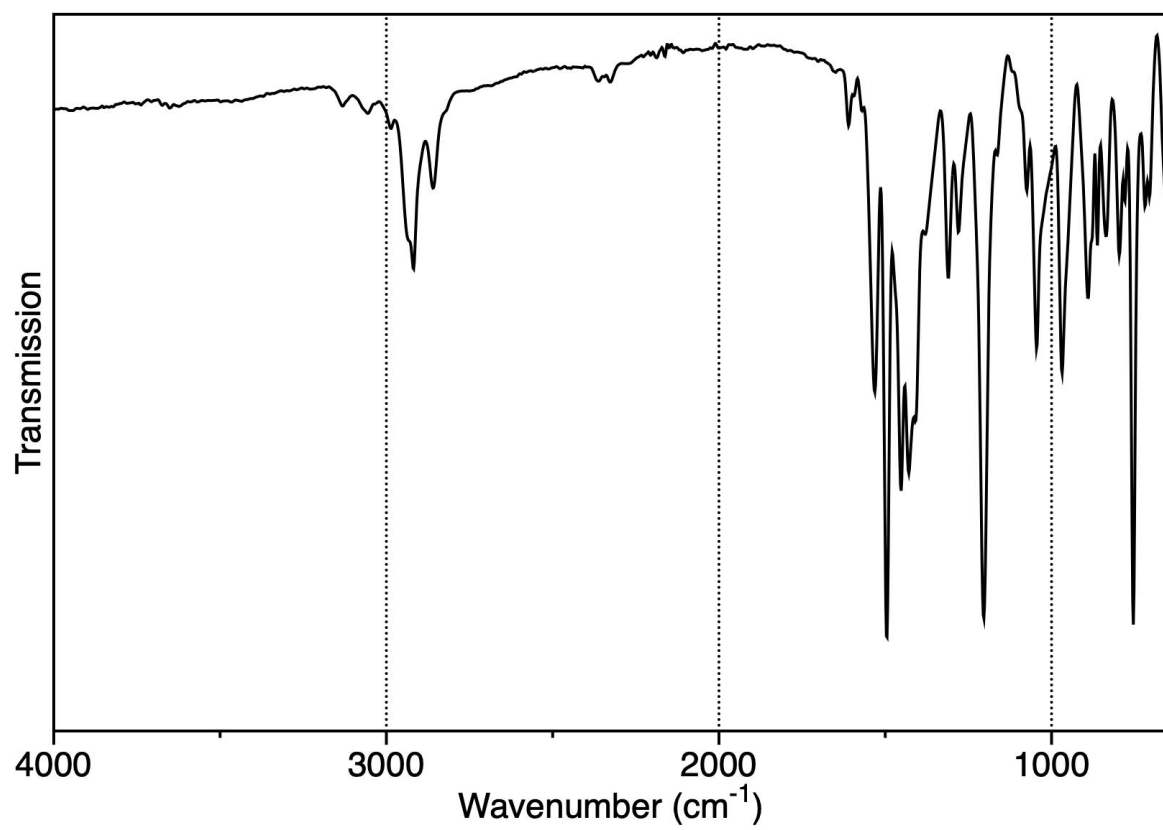

**Figure S7e.** IR spectrum of compound 7.

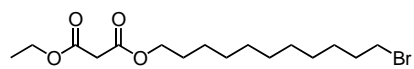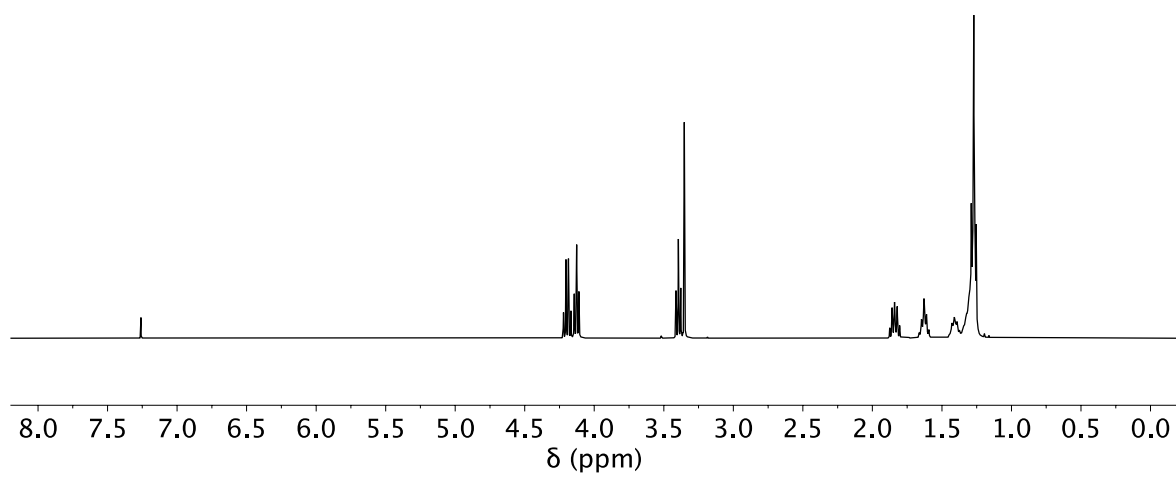

**Figure S8a.**  $^1\text{H}$  NMR spectrum of compound **12** (400 MHz,  $\text{CDCl}_3$ , 298K).

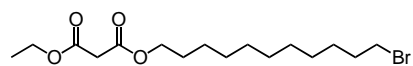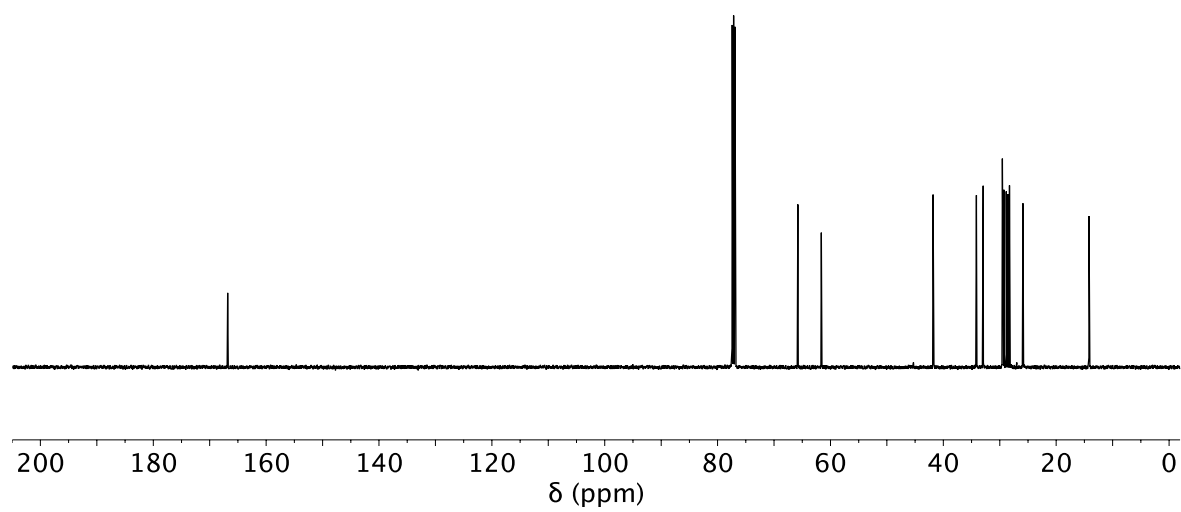

**Figure S8b.**  $^{13}\text{C}$  NMR spectrum of compound **12** (125 MHz,  $\text{CDCl}_3$ , 298K).



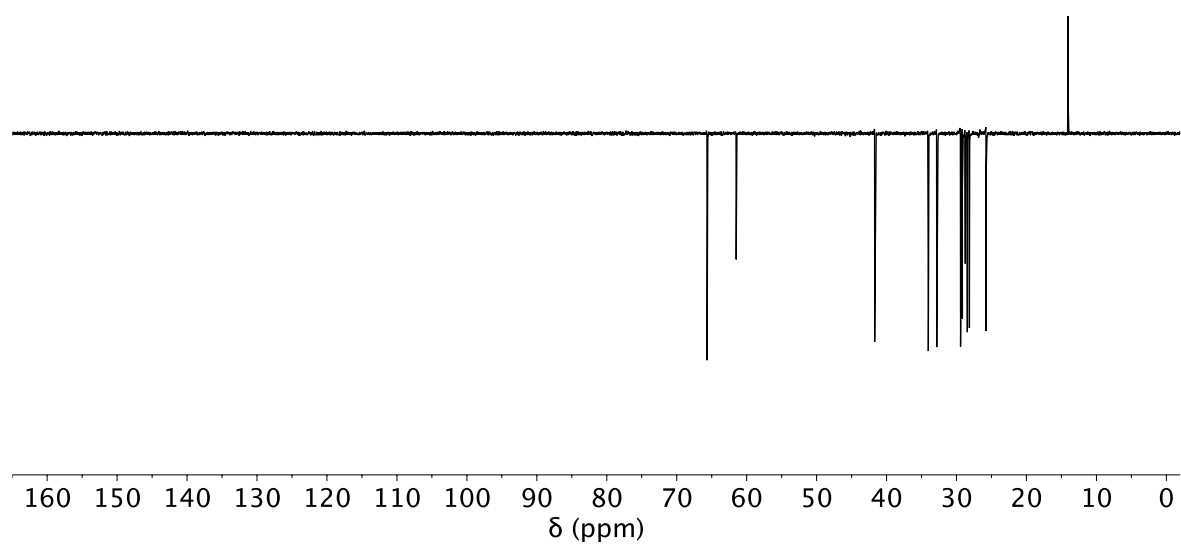

**Figure S8c.** DEPT spectrum of compound **12** (125 MHz, CDCl<sub>3</sub>, 298K).

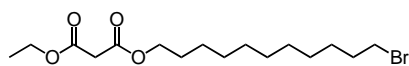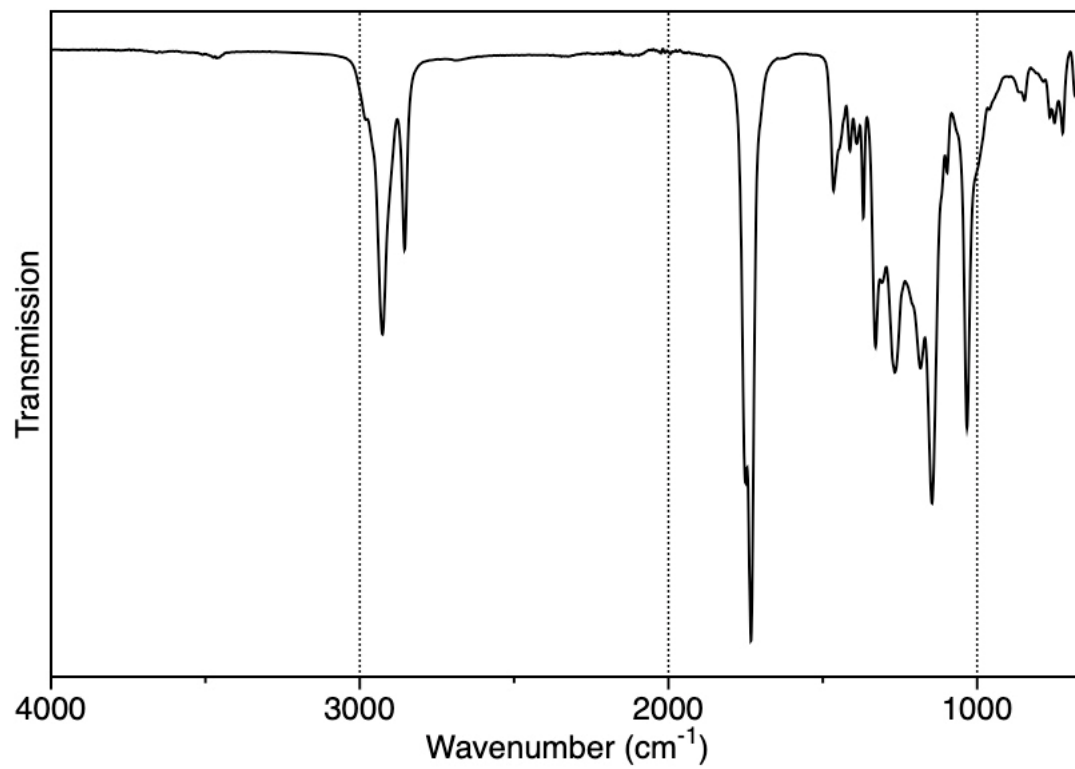

**Figure S8d.** IR spectrum of compound **12**.

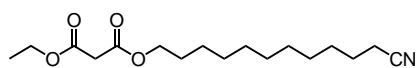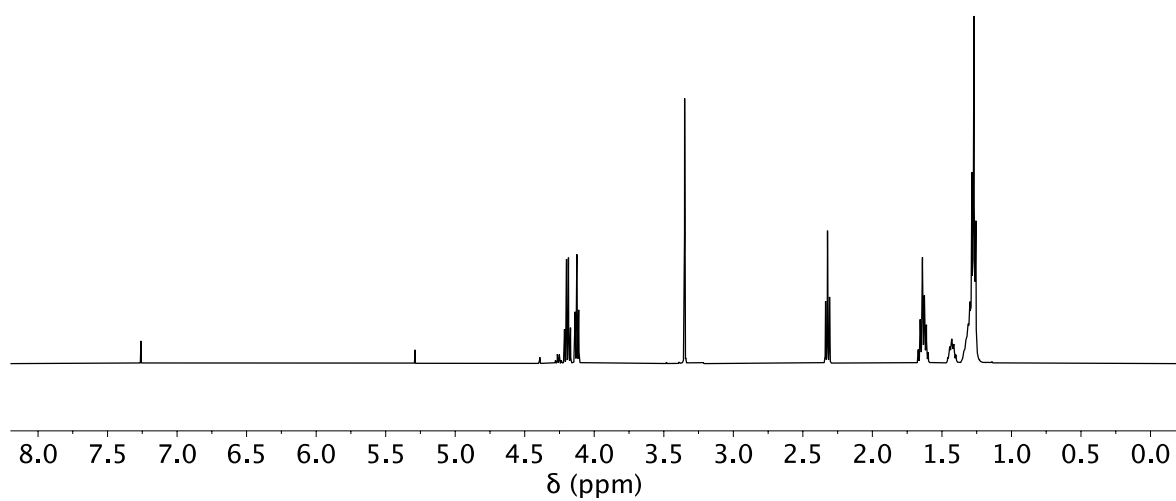

**Figure S9a.**  $^1\text{H}$  NMR spectrum of compound **13** (500 MHz,  $\text{CDCl}_3$ , 298K).

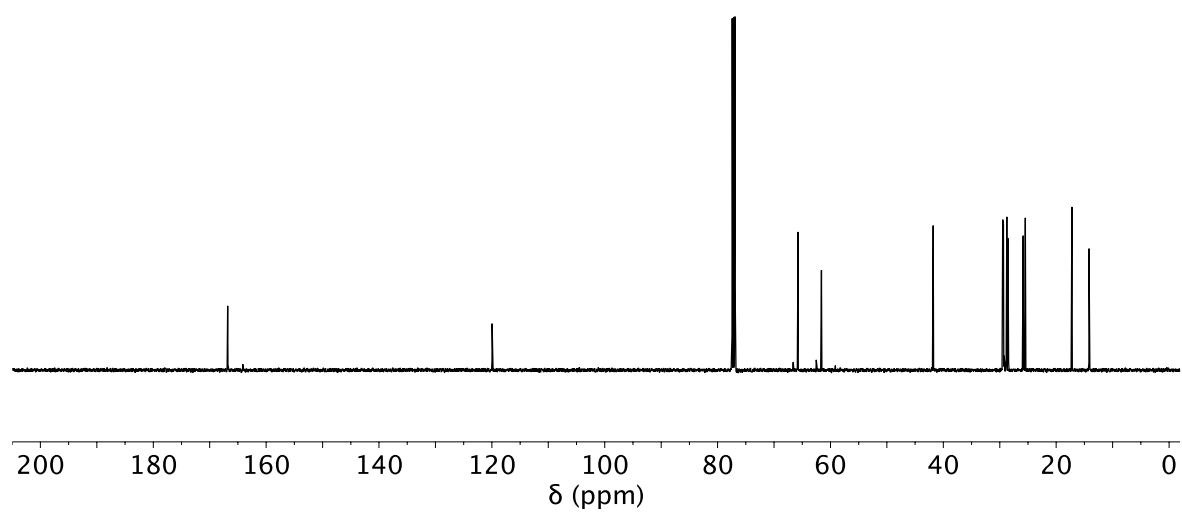

**Figure S9b.** <sup>13</sup>C NMR spectrum of compound **13** (125 MHz, CDCl<sub>3</sub>, 298K).

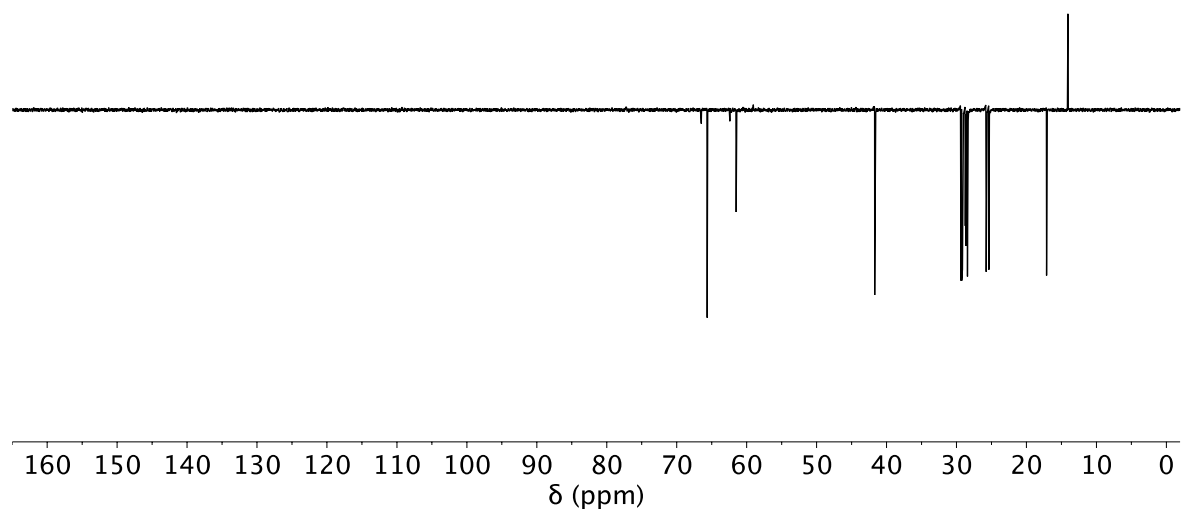

**Figure S9c.** DEPT spectrum of compound **13** (125 MHz, CDCl<sub>3</sub>, 298K).

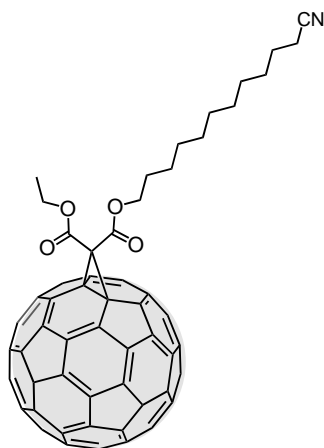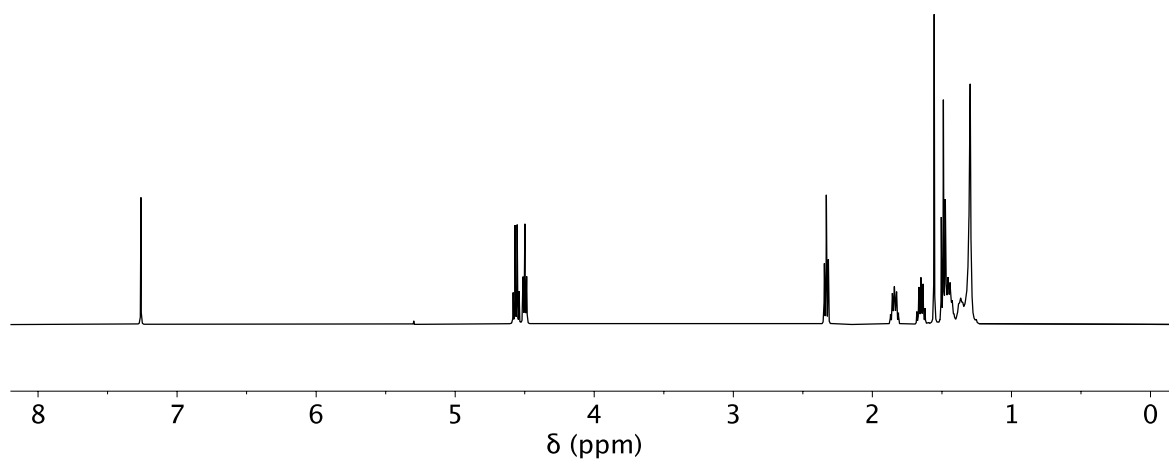

**Figure S10a.** <sup>1</sup>H NMR spectrum of compound **14** (500 MHz, CDCl<sub>3</sub>, 298K).



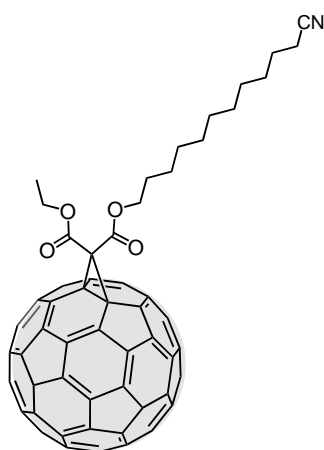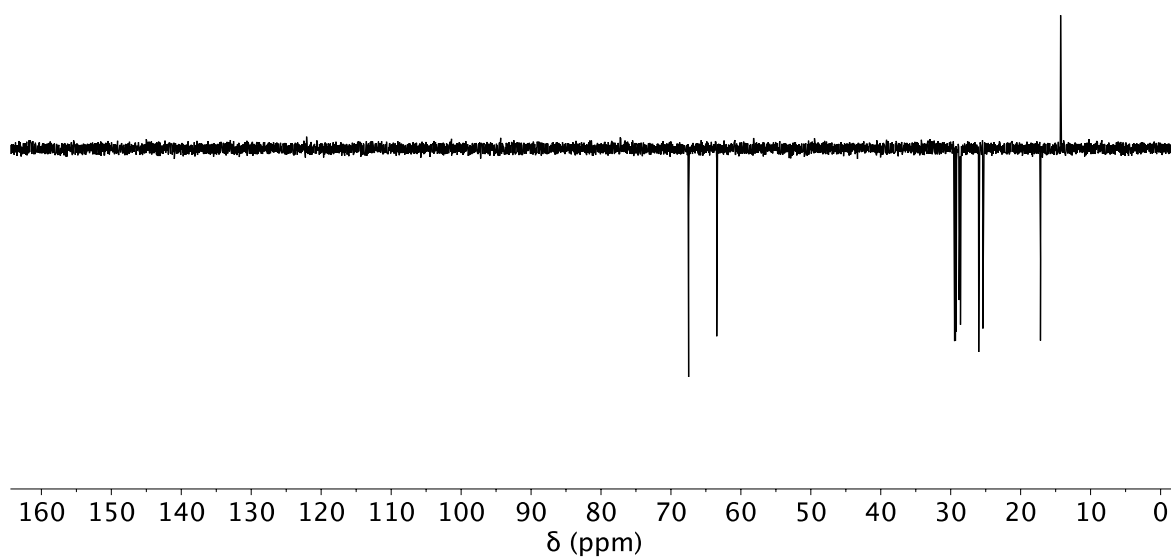

**Figure S10c.** DEPT spectrum of compound **14** (125 MHz, CDCl<sub>3</sub>, 298K).



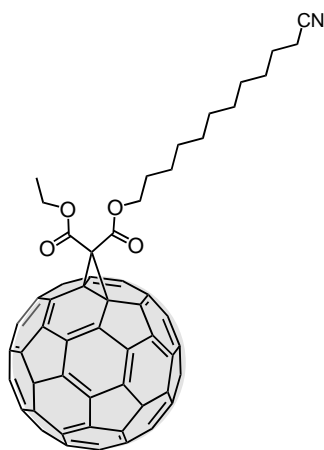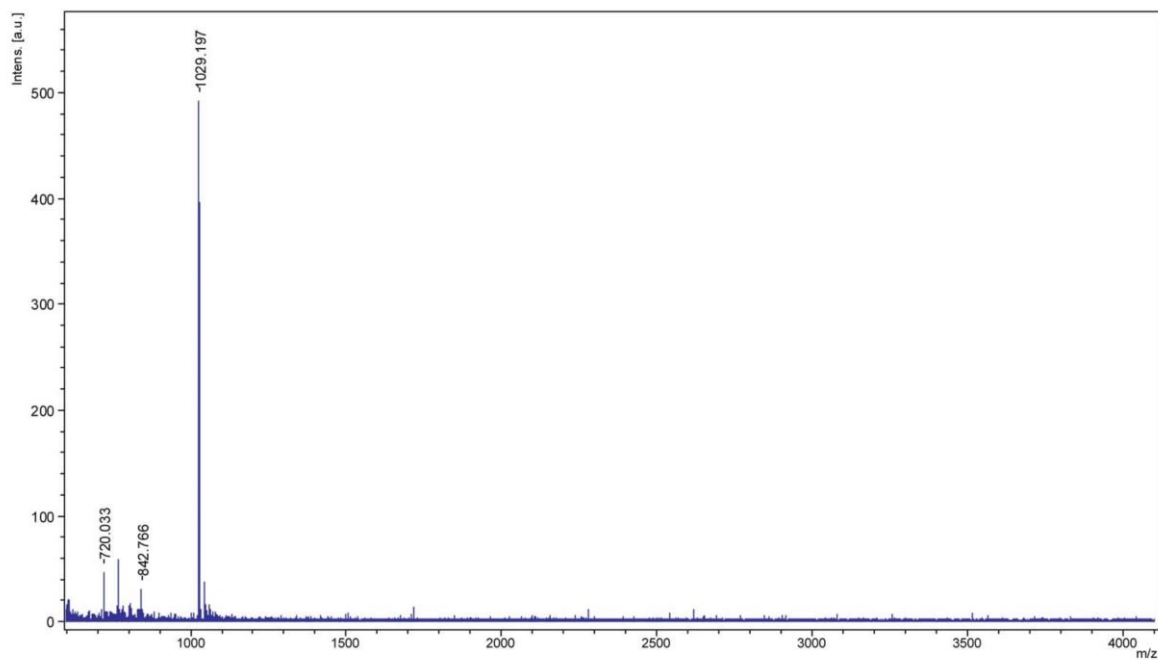

**Figure S10d.** MALDI-TOF mass spectrum of compound **14**.

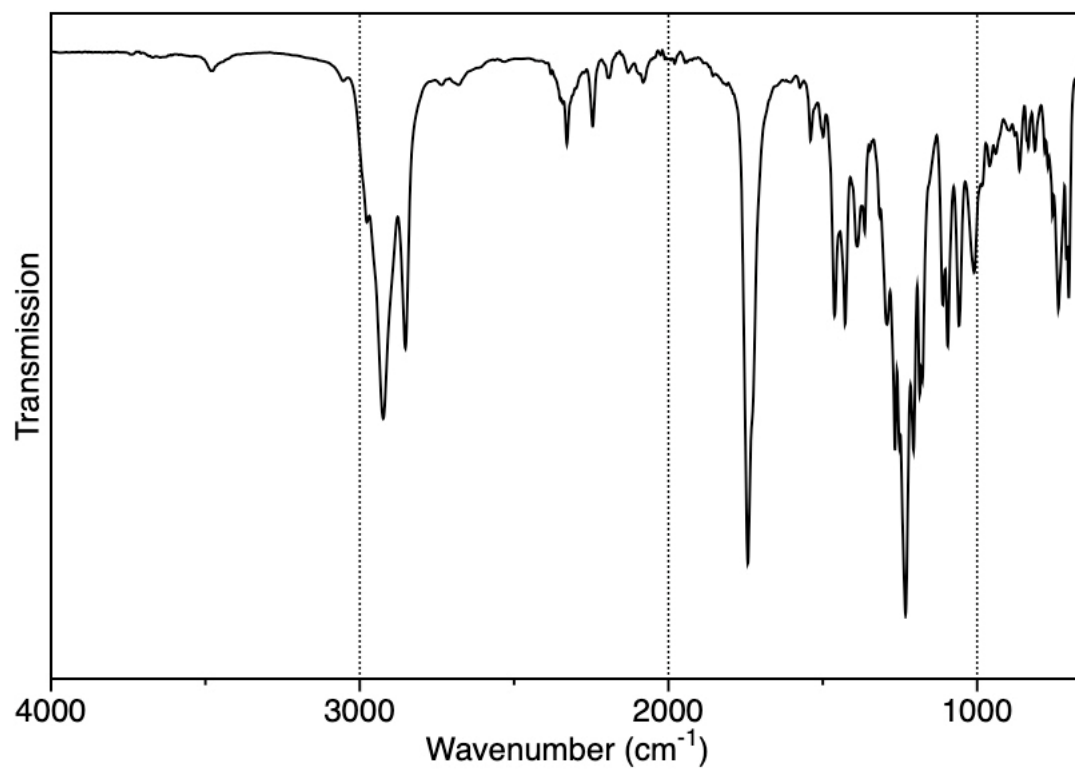

**Figure S10e.** IR spectrum of compound **14**.

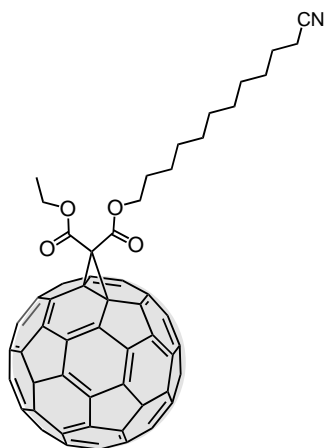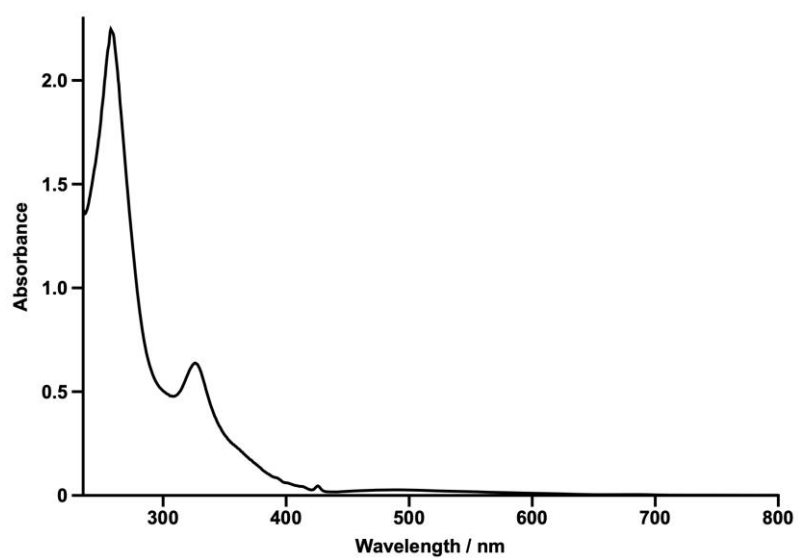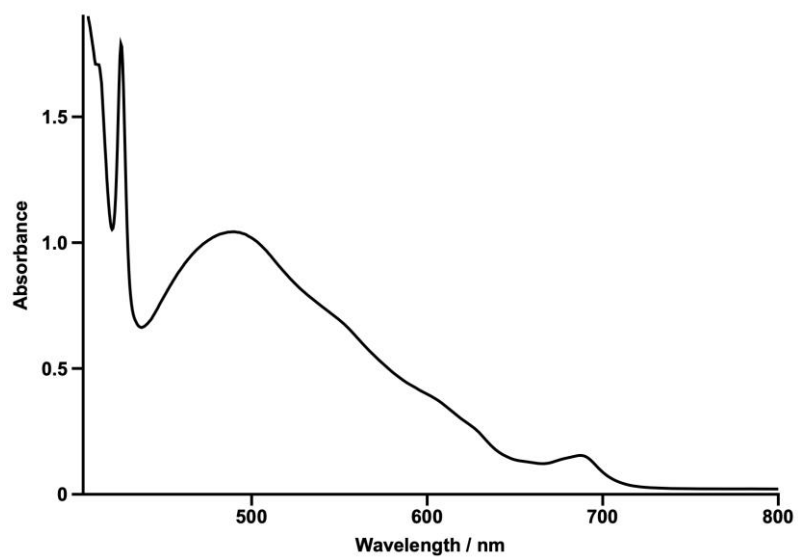

**Figure S10f.** UV/Vis spectra of compound **14** ( $\text{CH}_2\text{Cl}_2$ , 298K,  $d = 1$  cm, top:  $C_M = 1.57 \times 10^{-5}$  M; bottom:  $C_M = 6.31 \times 10^{-4}$  M).

### Thin layer cyclic voltammetry

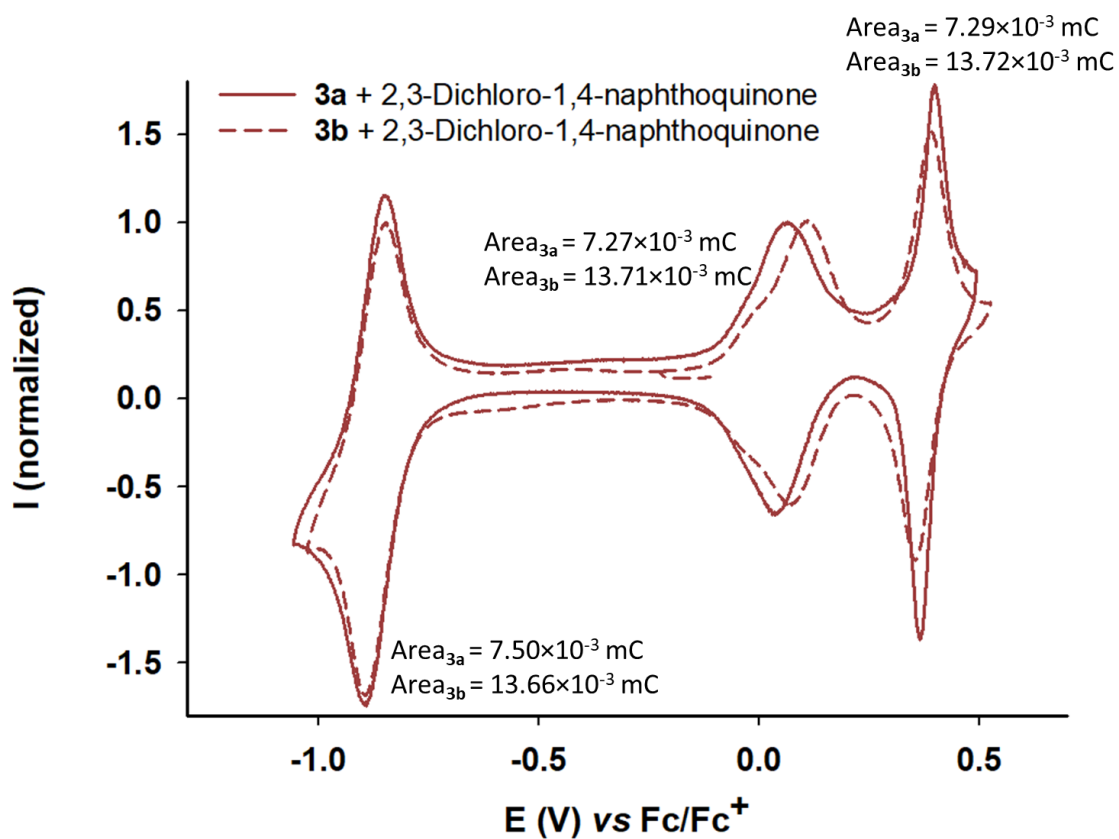

**Figure S11.** Thin Layer Cyclic Voltammetry of compounds **3a** and **3b** ( $C = 2.5 \times 10^{-4}$  M,  $\text{CH}_2\text{Cl}_2:\text{CH}_3\text{CN}$ , 90:10 for **3a** and 75:25 for **3b**,  $C_{\text{Dichlon}} = 2.5 \times 10^{-3}$  M, 0.1 M  $n\text{Bu}_4\text{NPF}_6$ ,  $v = 10$   $\text{mV} \cdot \text{s}^{-1}$ , Pt), E vs Fc/Fc<sup>+</sup>.

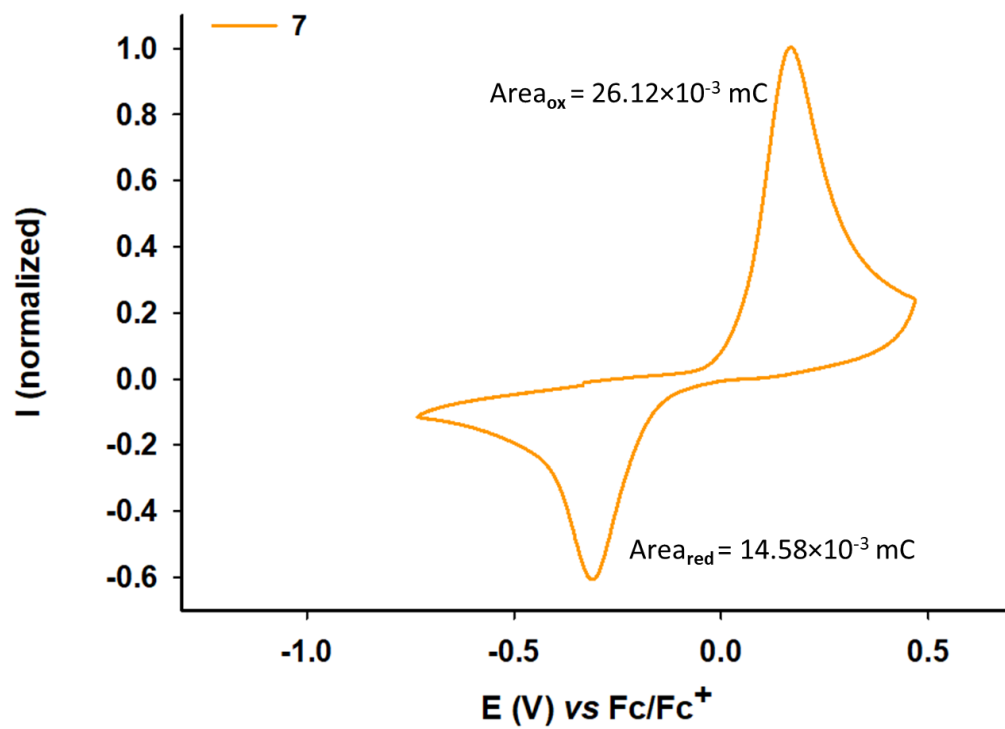

**Figure S12.** Cyclic Voltammetry of compound **7** ( $C = 2.5 \times 10^{-4} \text{ M}$ ,  $\text{CH}_2\text{Cl}_2$ ,  $0.1 \text{ M } n\text{Bu}_4\text{NPF}_6$ ,  $\nu = 100 \text{ mV} \cdot \text{s}^{-1}$ , Pt),  $E$  vs  $Fc/Fc^+$ .

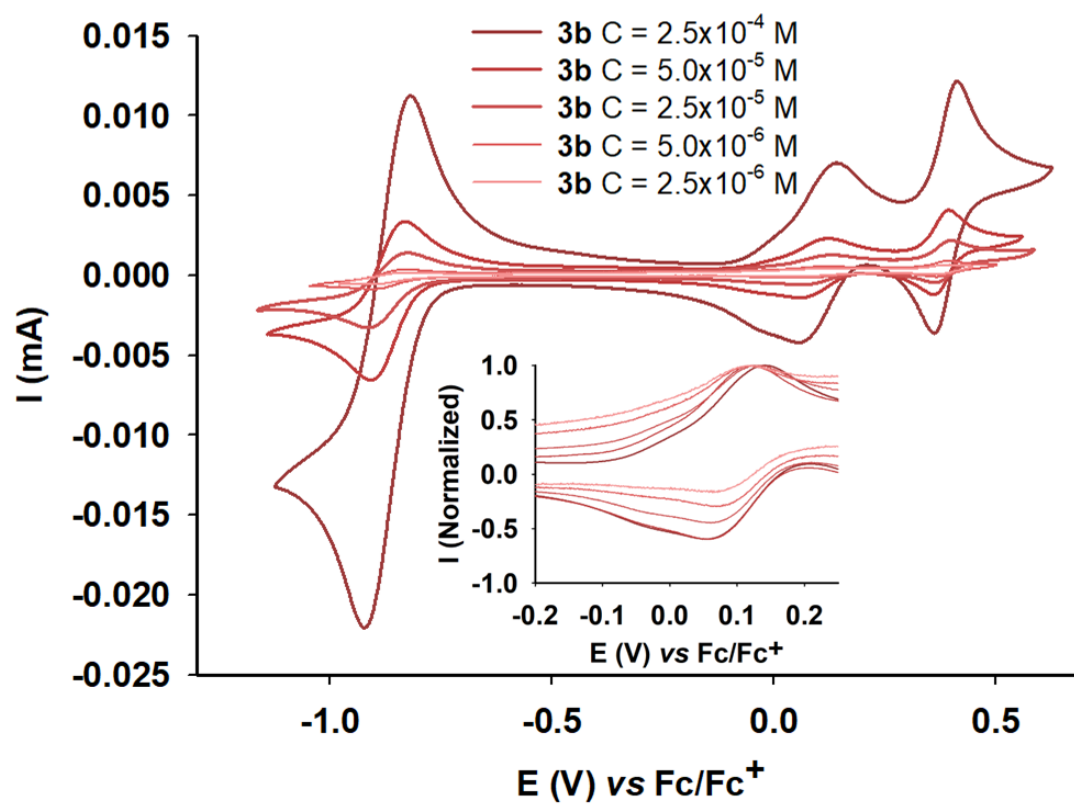

**Figure S13.** Cyclic Voltammetry of compound **3b** ( $C = 2.5 \times 10^{-4}$  M,  $CH_2Cl_2:CH_3CN$ , 75:25), diffusion regime, in presence of 10 equiv. of 2,3-dichloro-1,4-naphthoquinone,  $\nu = 100 \text{ mV.s}^{-1}$ .

## $^1\text{H}$ NMR titration experiments

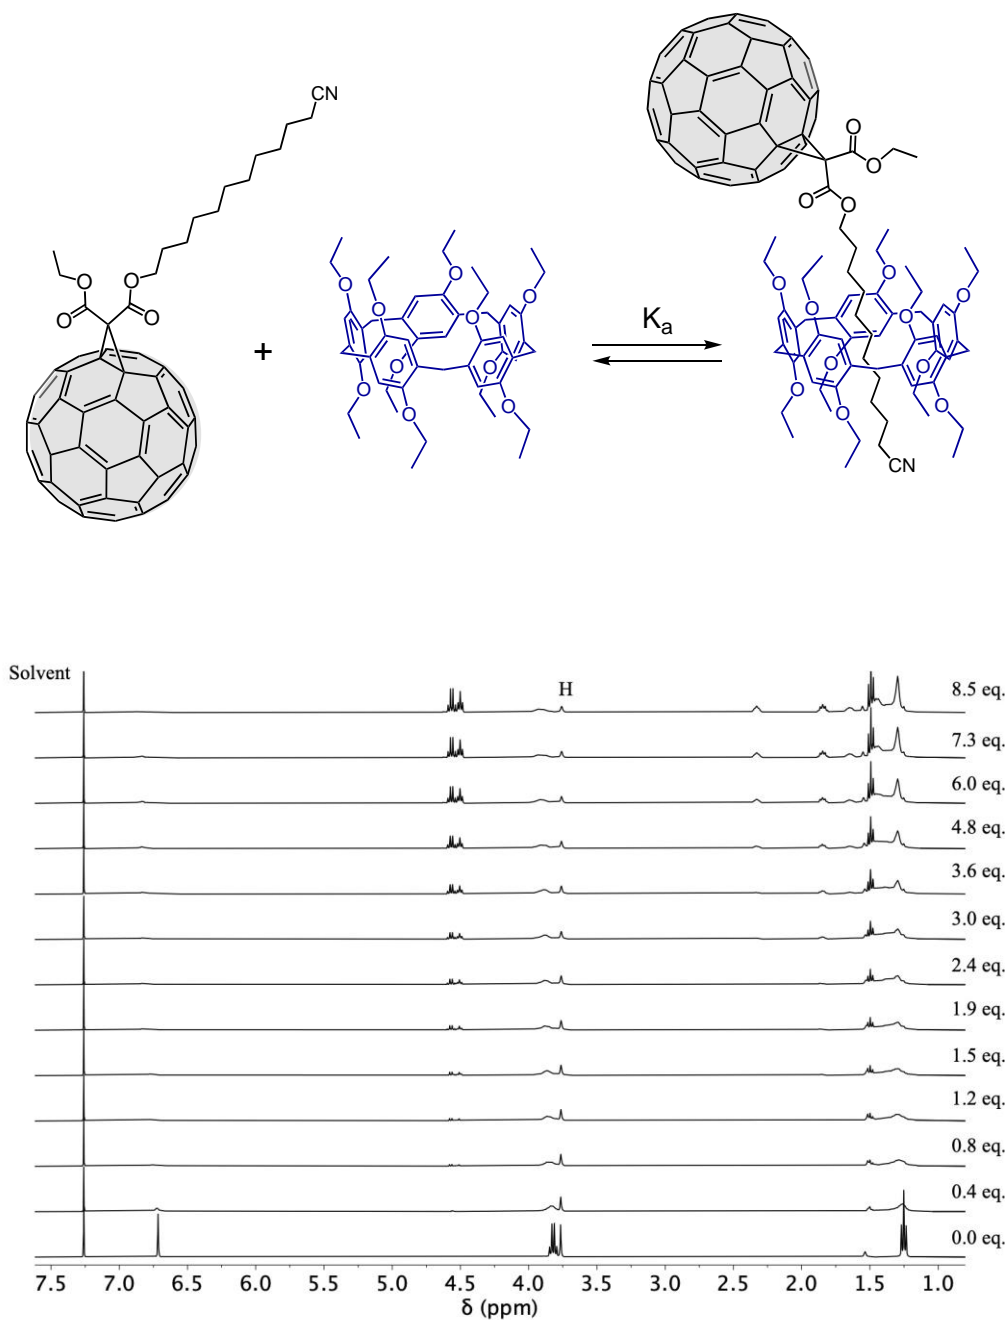

**Figure S14a.**  $^1\text{H}$  NMR spectra (400 MHz,  $\text{CDCl}_3$ , 298K) recorded upon successive additions of guest **14** to a solution of host **8** (3.8 mM).

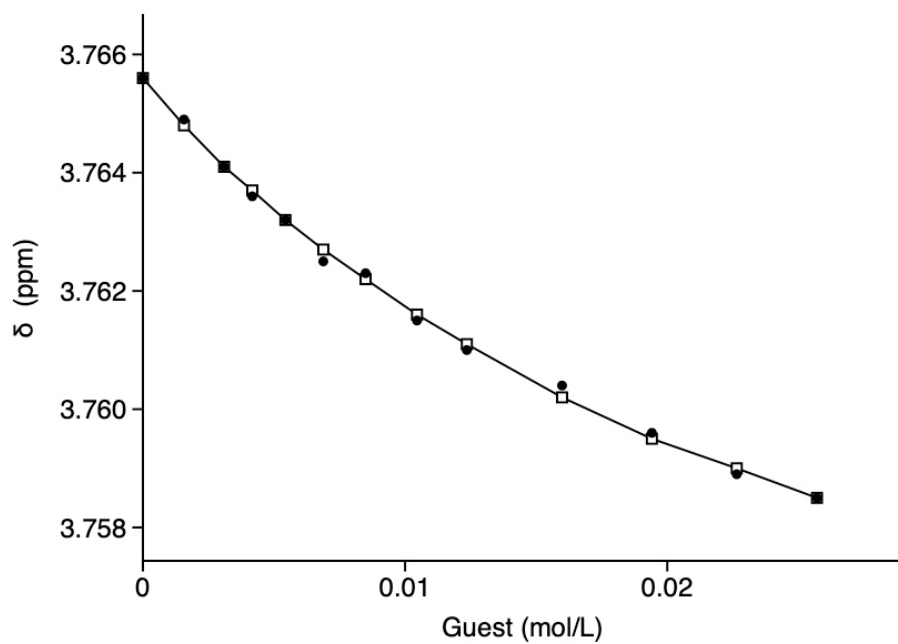

**Fig. S14b.** Chemical shifts of H (**8**, calculated:  $\square$ , experimental:  $\bullet$ ) as a function of guest concentration.



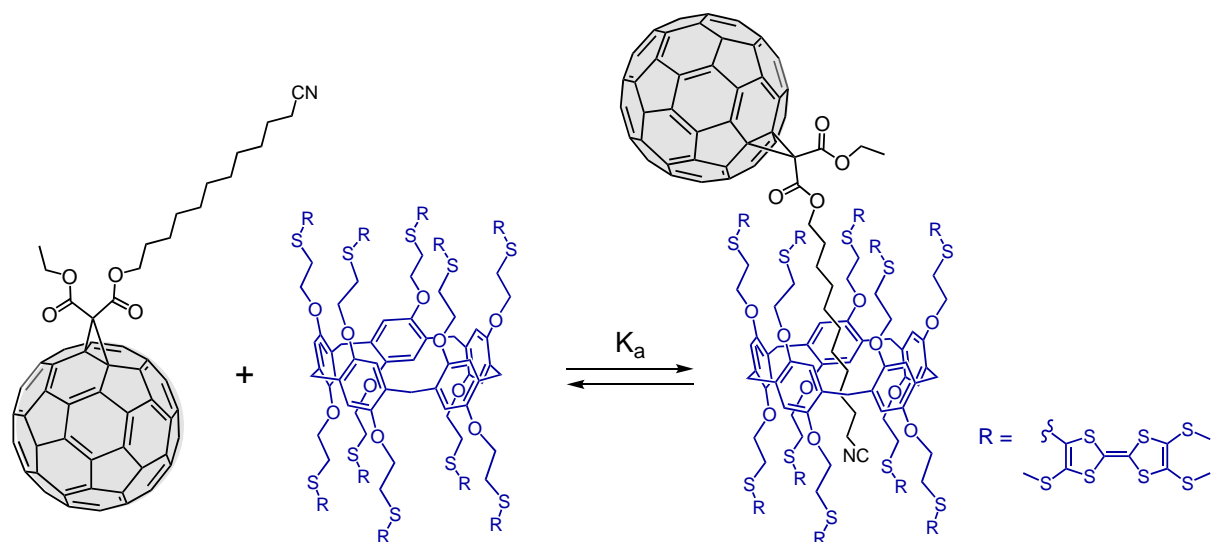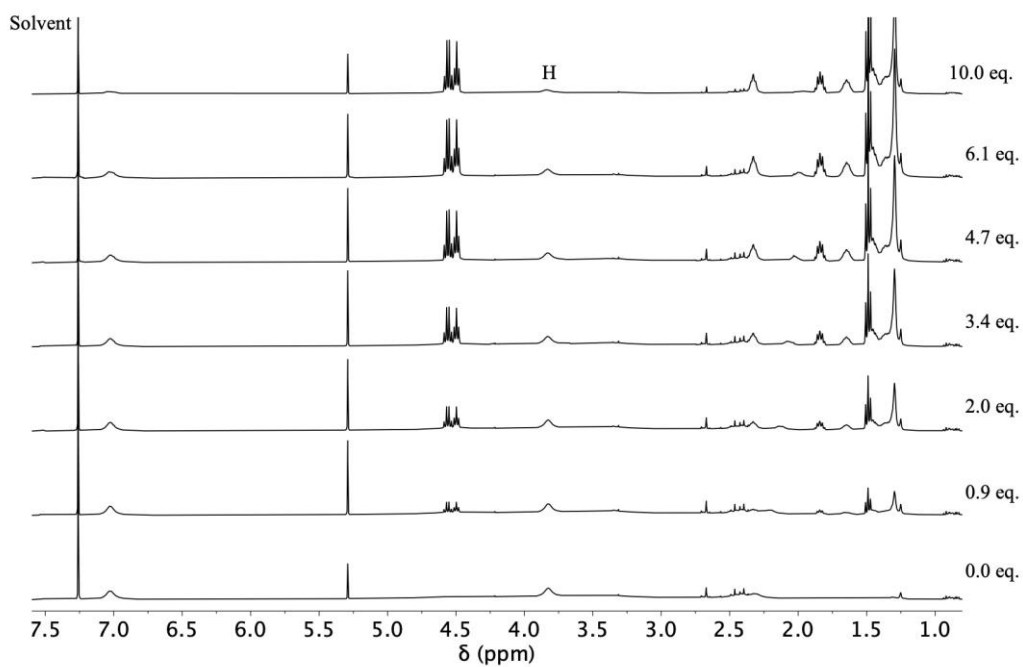

**Figure S15a.** Selected  $^1\text{H}$  NMR spectra (400 MHz,  $\text{CDCl}_3$ , 298K) recorded upon successive additions of guest **14** to a solution of host **3b** (4 mM).

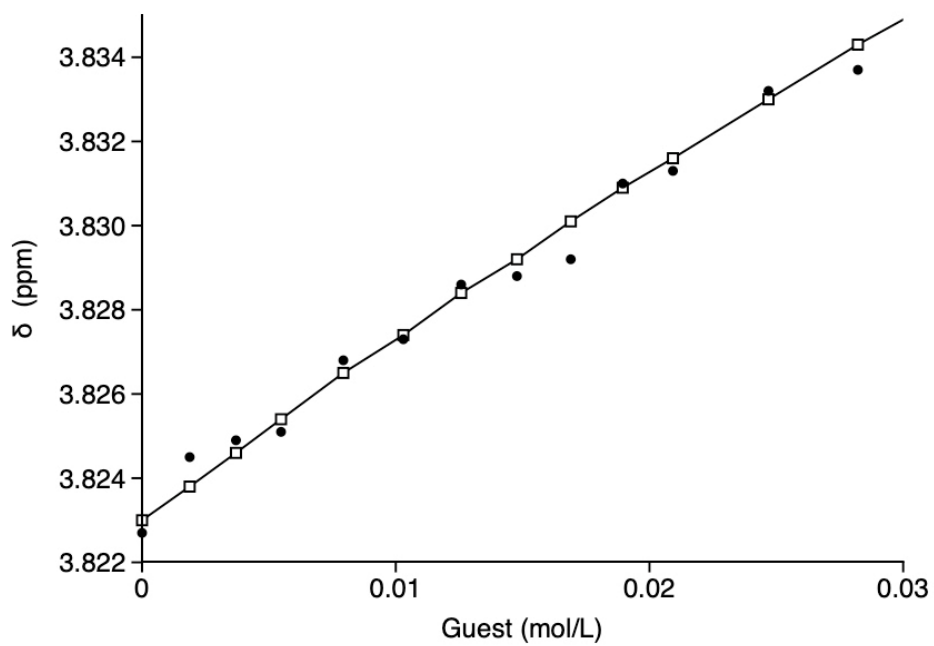

**Fig. S15b.** Chemical shifts of H<sub>A</sub> (**3b**, calculated: □, experimental: ●) as a function of guest concentration.

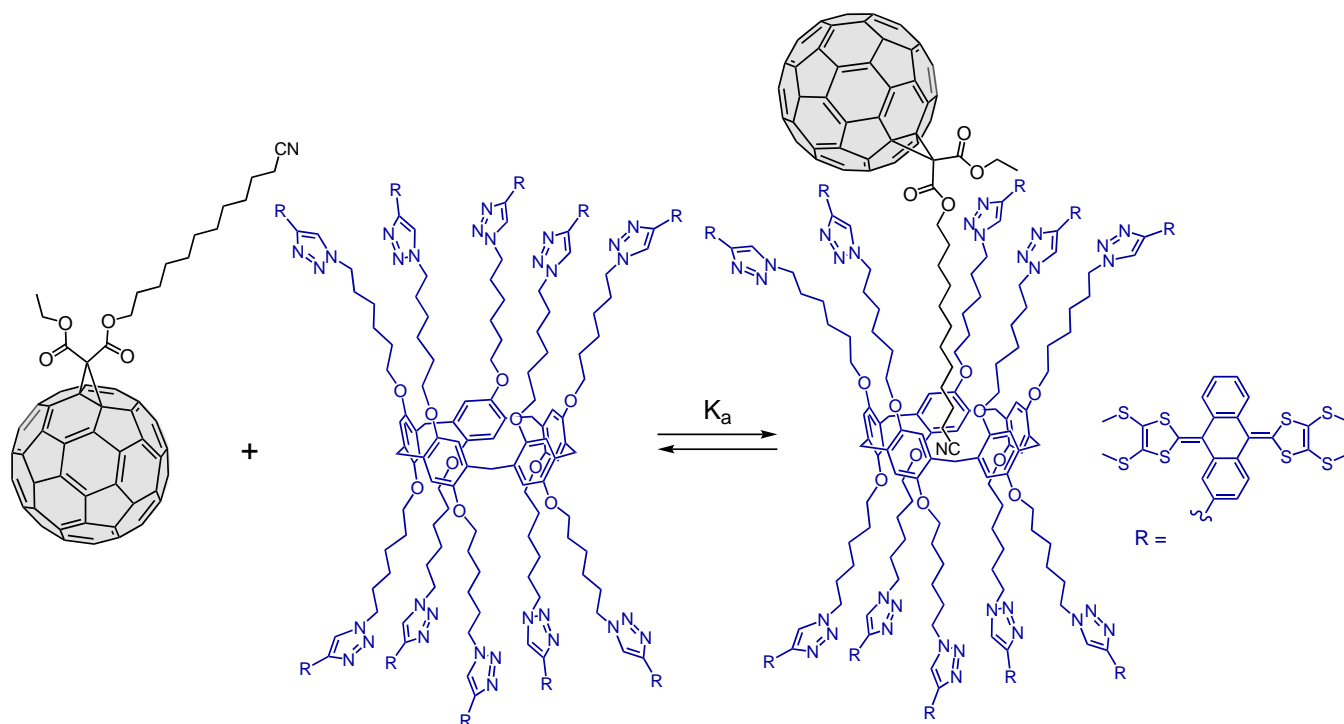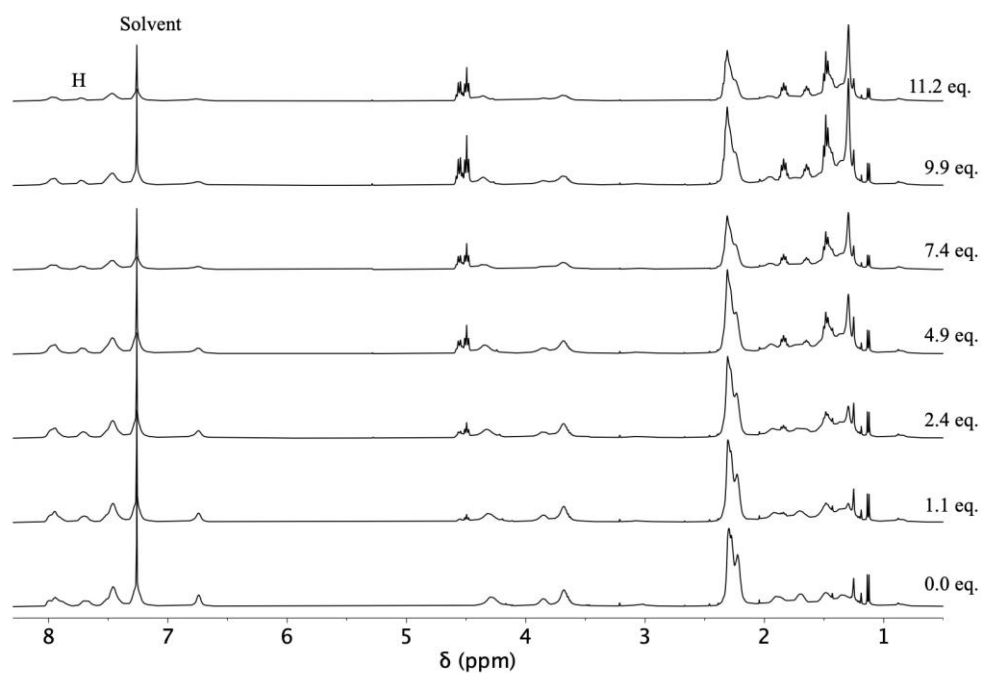

**Figure S16a.** Selected  $^1\text{H}$  NMR spectra (400 MHz,  $\text{CDCl}_3$ , 298K) recorded upon successive additions of guest **14** to a solution of host **7** (2.9 mM).

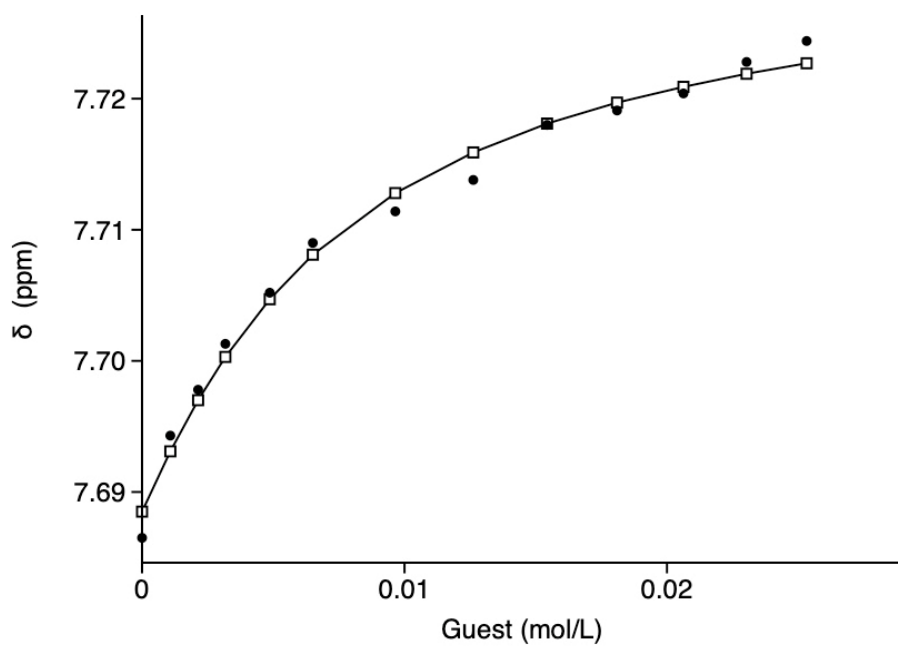

**Fig. S16b.** Chemical shifts of H<sub>A</sub> (**7**, calculated:  $\square$ , experimental:  $\bullet$ ) as a function of guest concentration.

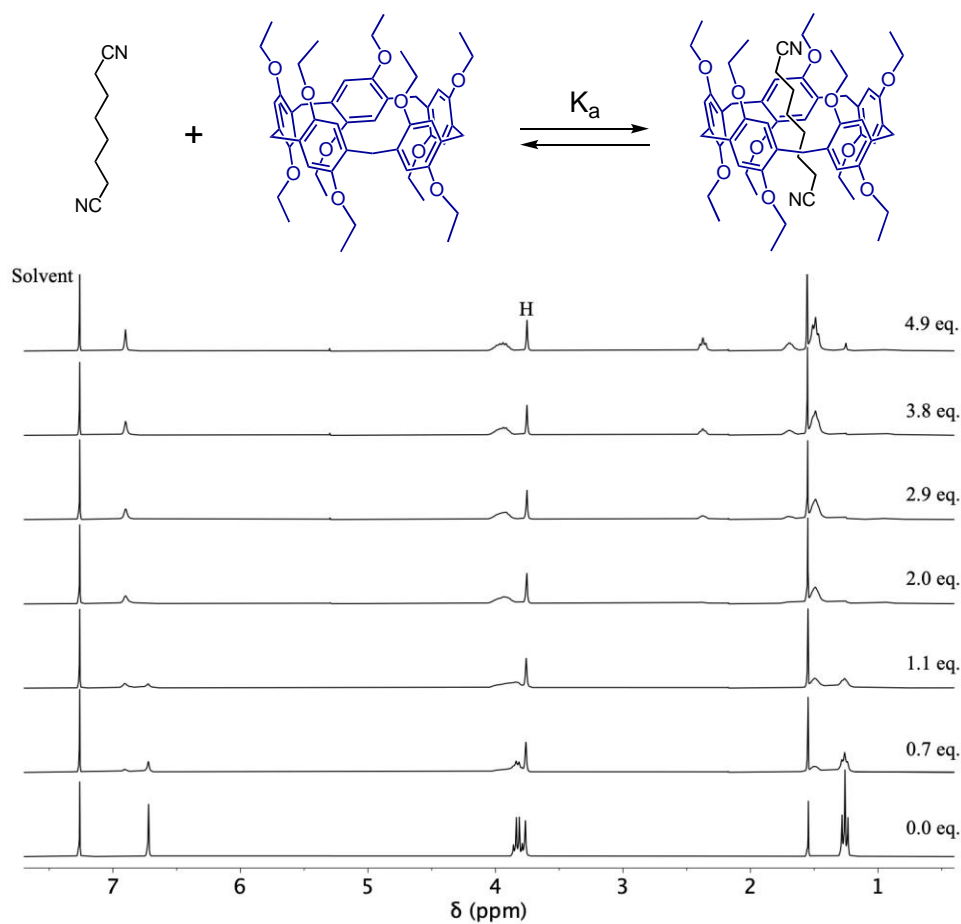

**Figure S17a.** Selected  $^1\text{H}$  NMR spectra (300 MHz,  $\text{CDCl}_3$ , 298K) recorded upon successive additions of guest **9** to a solution of host **8** (2.1 mM).

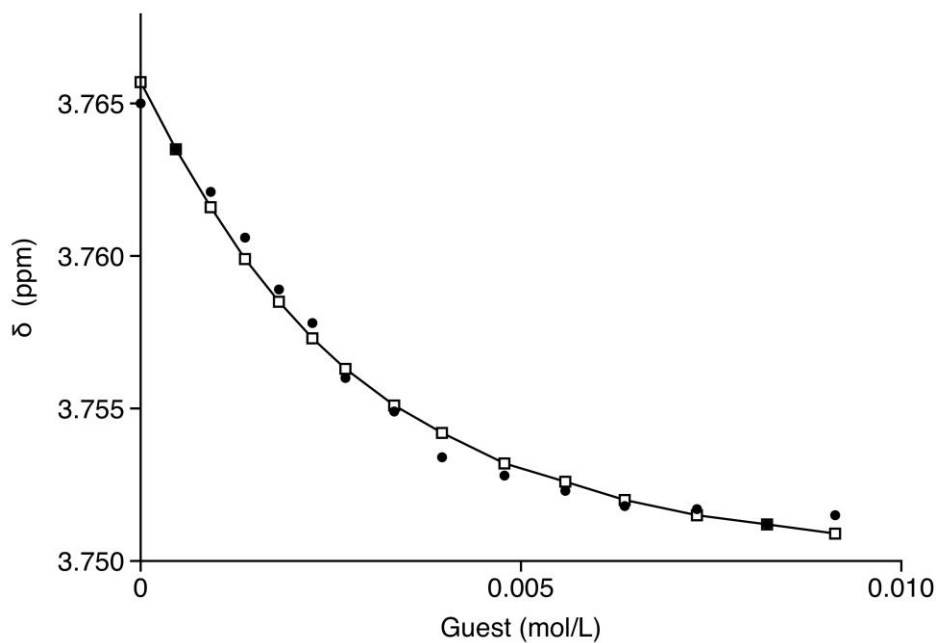

**Fig. S17b.** Chemical shifts of  $\text{H}_A$  (**8**, calculated:  $\square$ , experimental:  $\bullet$ ) as a function of guest concentration.

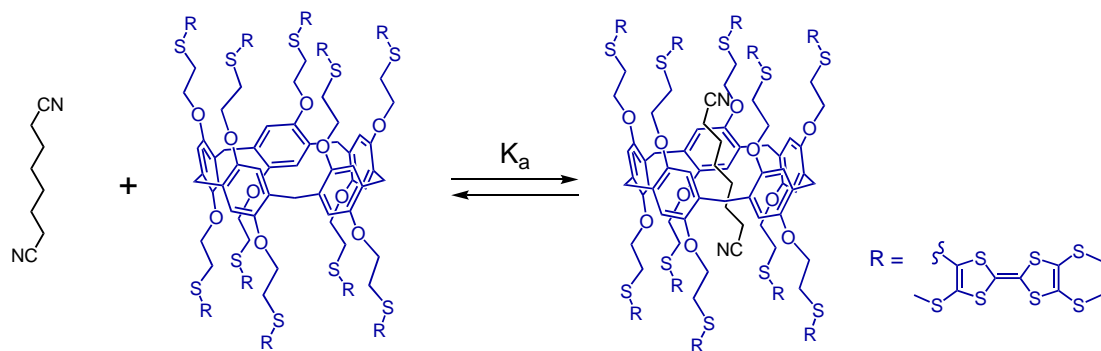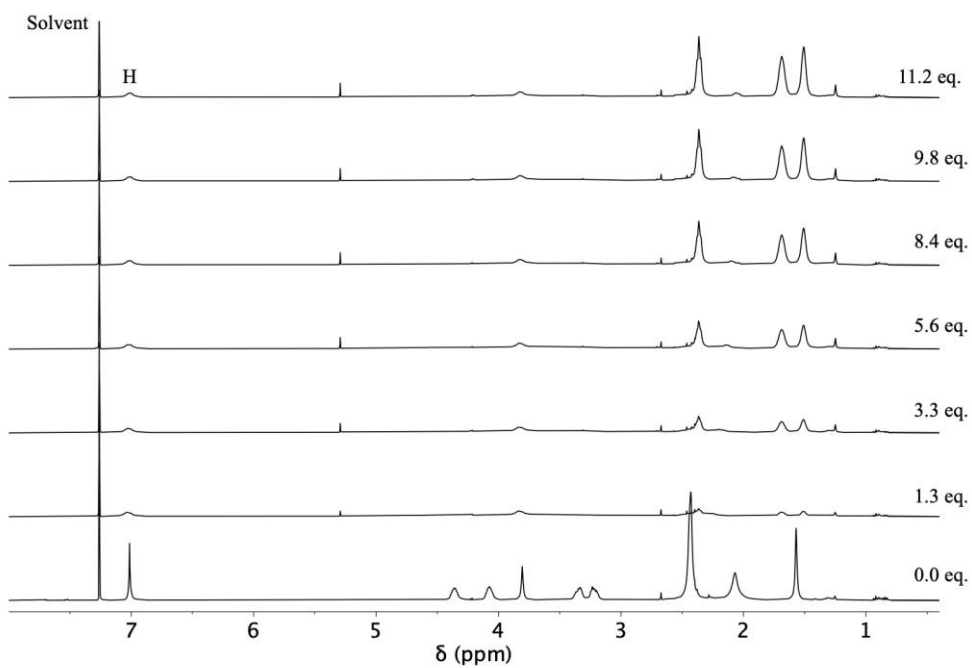

**Figure S18a.** Selected  $^1\text{H}$  NMR spectra (400 MHz,  $\text{CDCl}_3$ , 298K) recorded upon successive additions of guest **9** to a solution of host **3b** (3.4 mM).

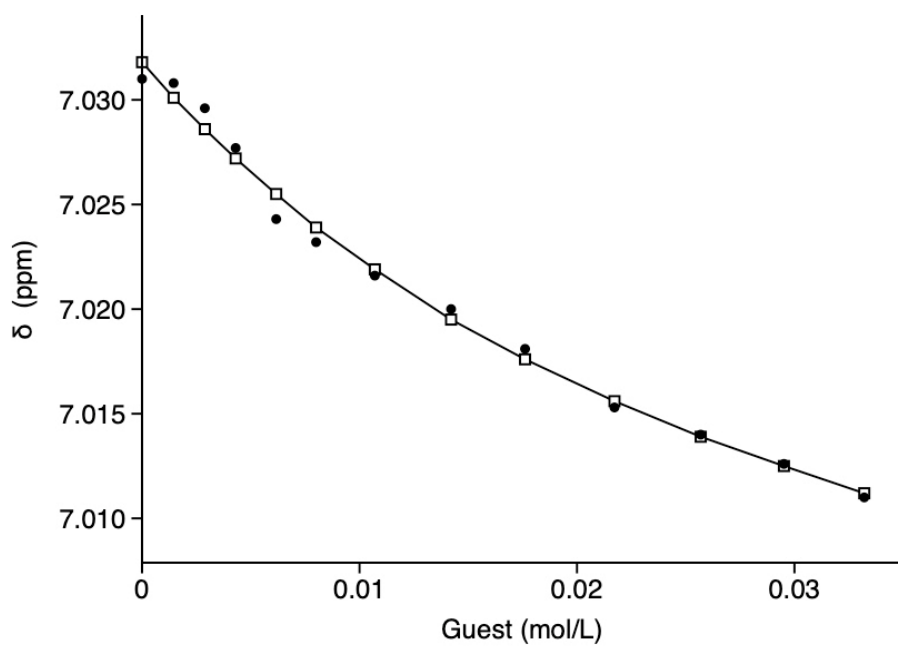

**Fig. S18b.** Chemical shifts of H<sub>A</sub> (**3b**, calculated:  $\square$ , experimental:  $\bullet$ ) as a function of guest concentration.

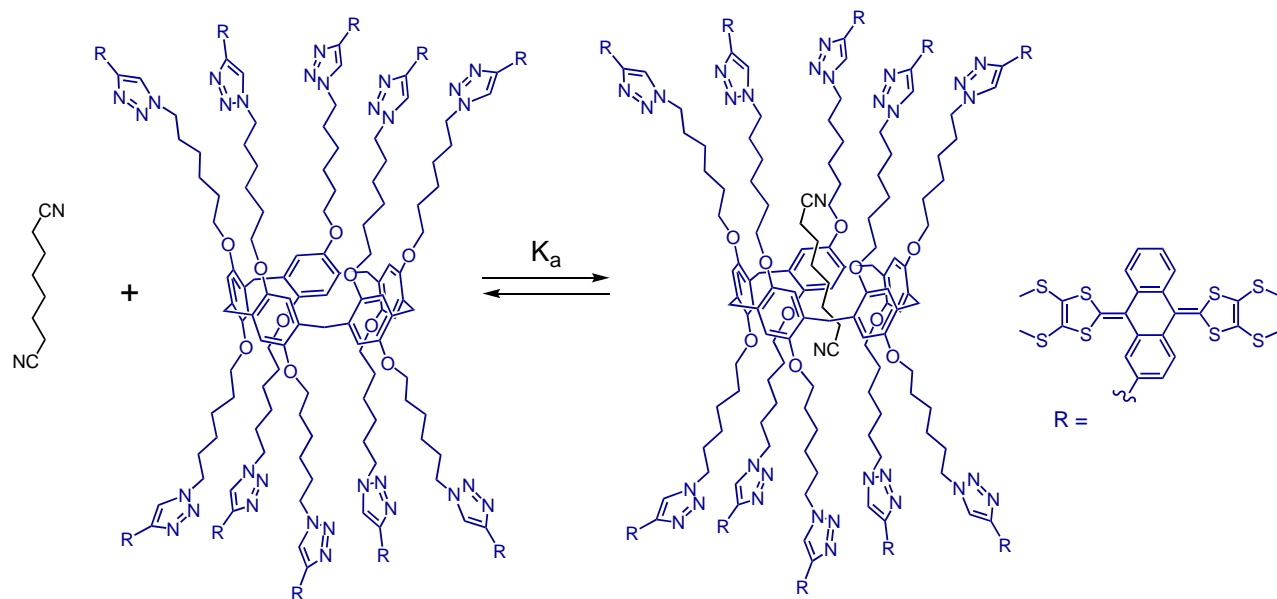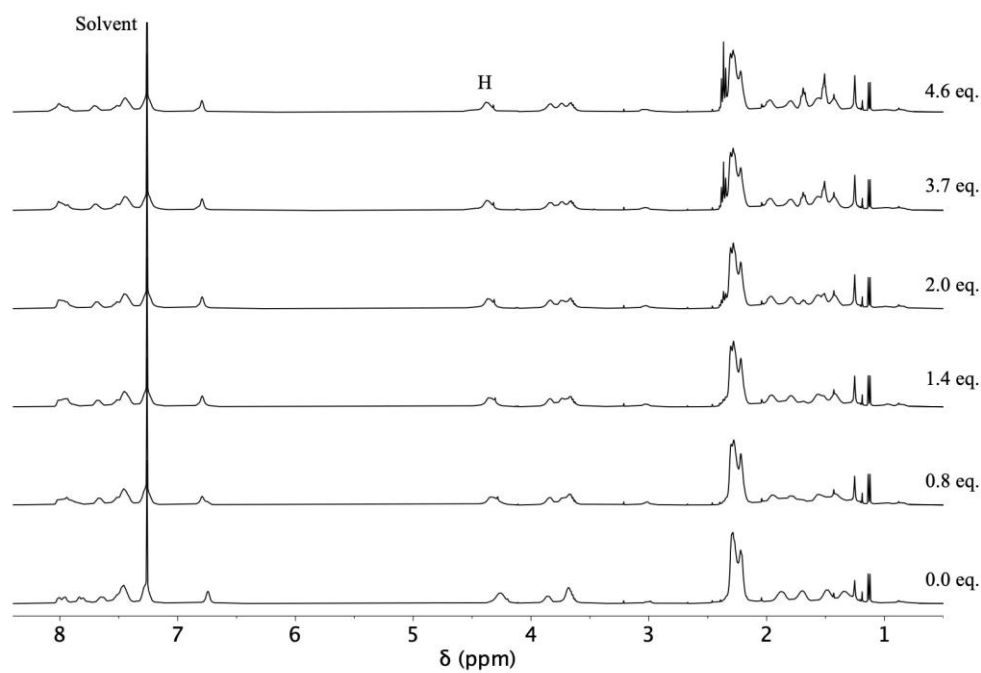

**Figure S19a.** Selected  $^1\text{H}$  NMR spectra (400 MHz,  $\text{CDCl}_3$ , 298K) recorded upon successive additions of guest **9** to a solution of host **7** (2.2 mM).



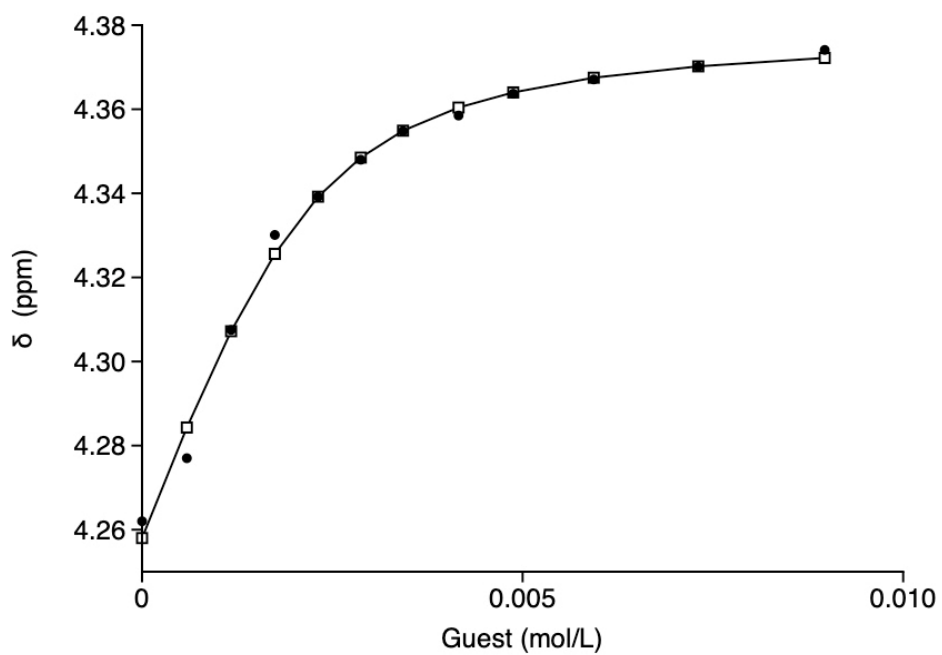

**Fig. S19b.** Chemical shifts of H<sub>A</sub> (7, calculated: □, experimental: ●) as a function of guest concentration.

## Calculated structures

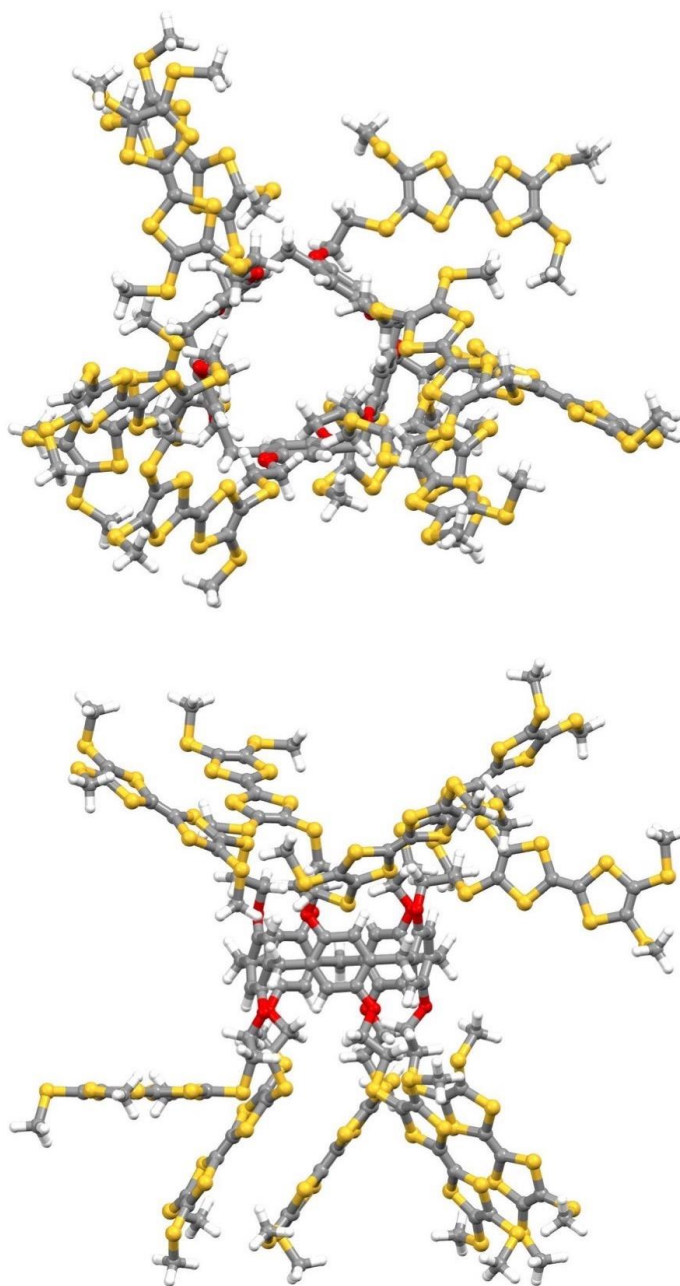

**Fig. S20a.** Front and top views of the calculated structure of compound **3b**.

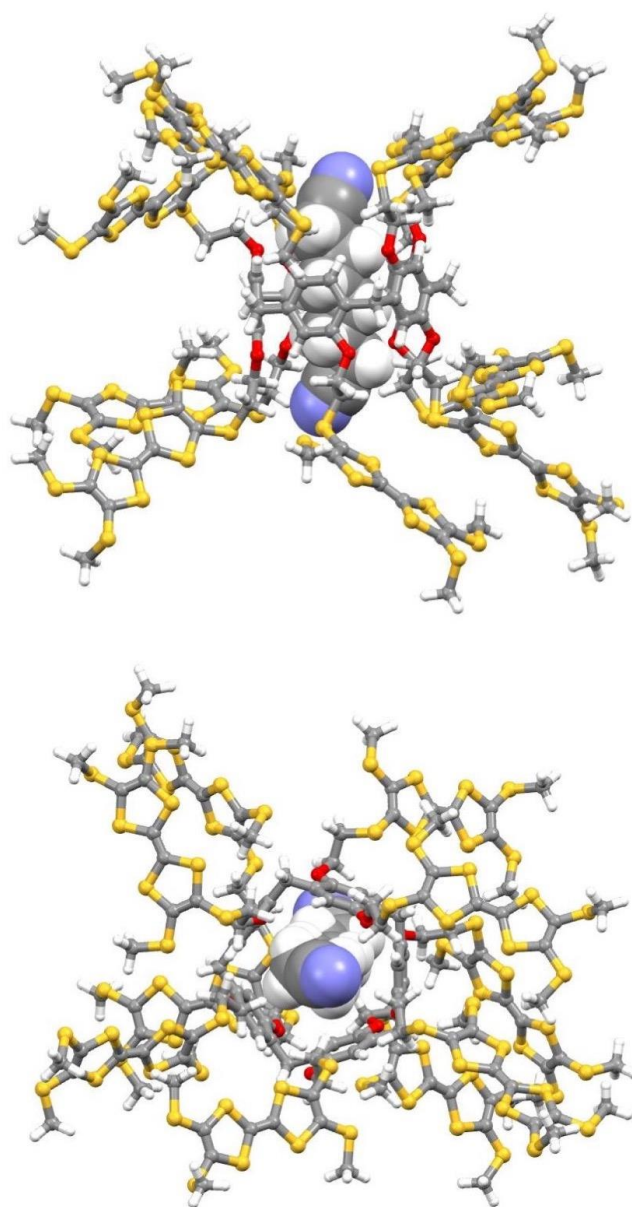

**Fig. S20b.** Front and top views of the calculated structure of inclusion complex [9 ⊂ 3b].

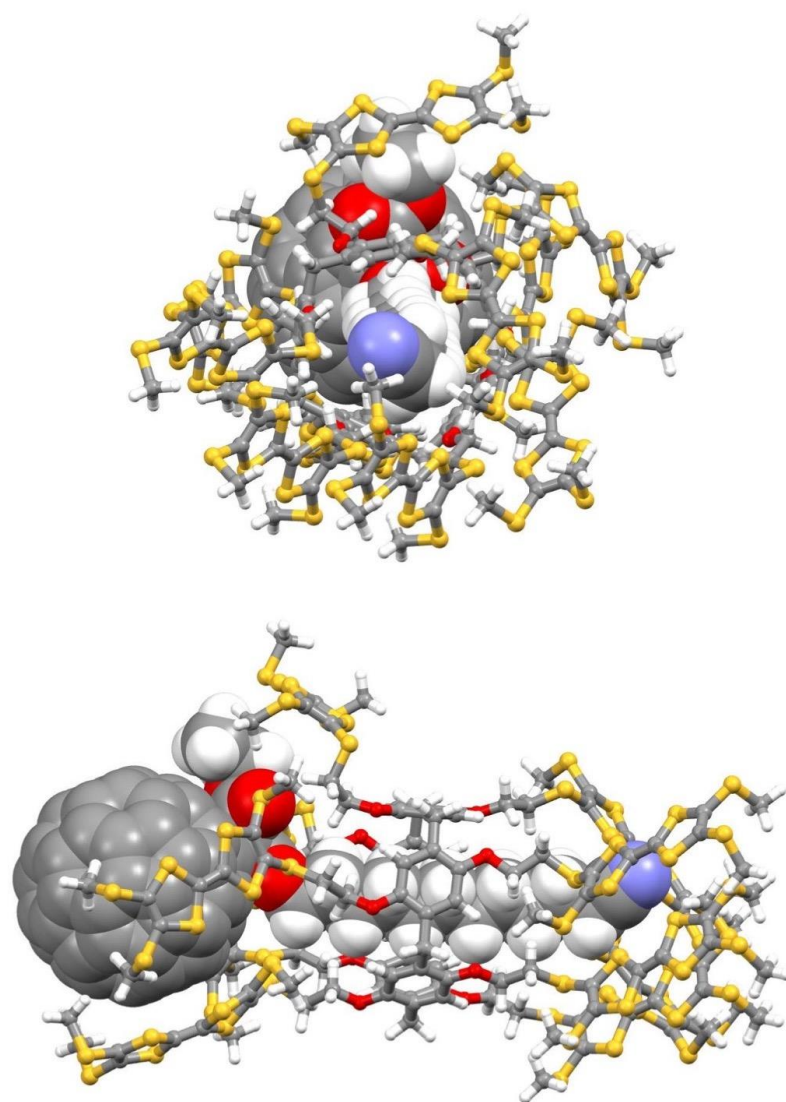

**Fig. S20c.** Top and front views of the calculated structure of inclusion complex [14 ⊂ 3b].

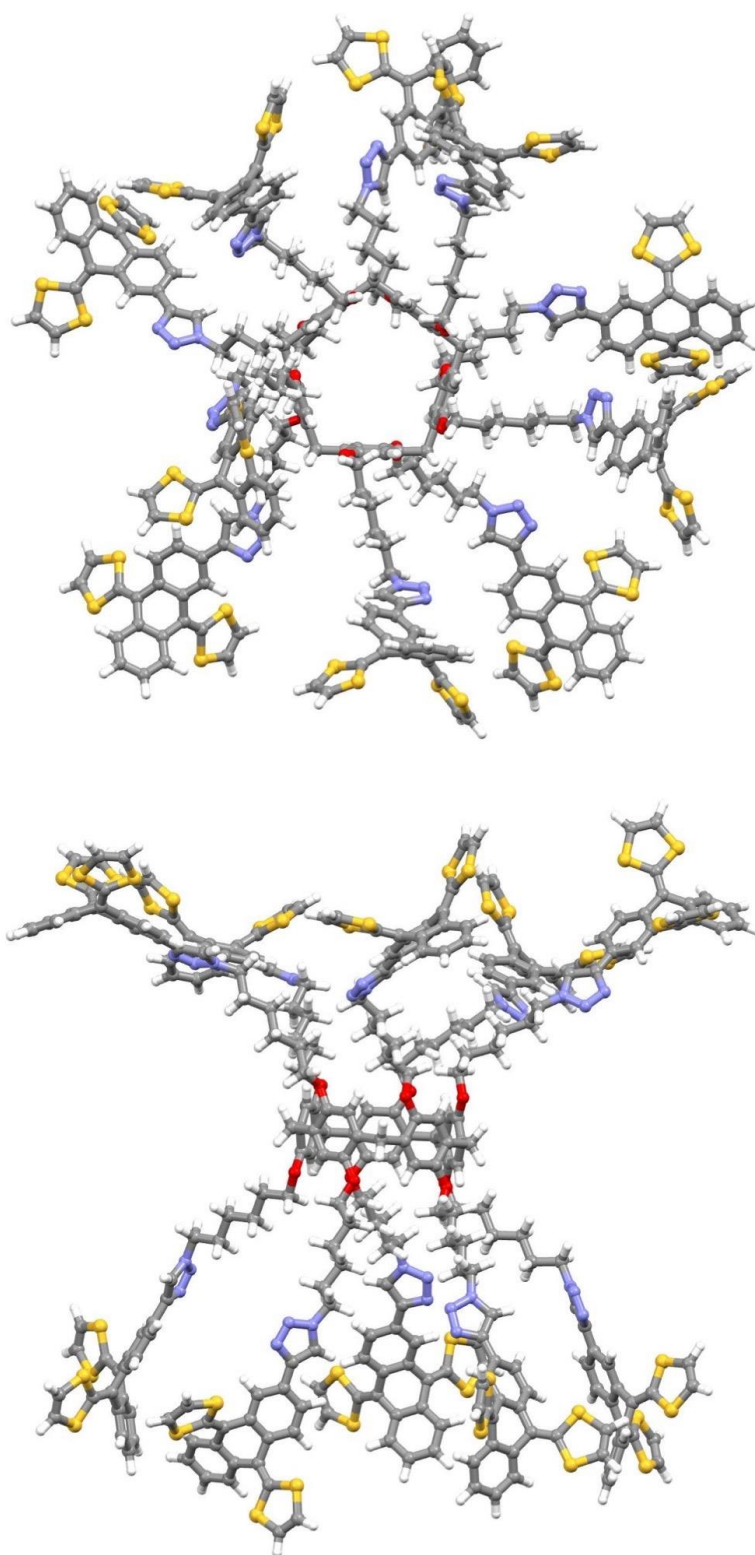

**Fig. S20d.** Top and front views of the calculated structure of compound 7.

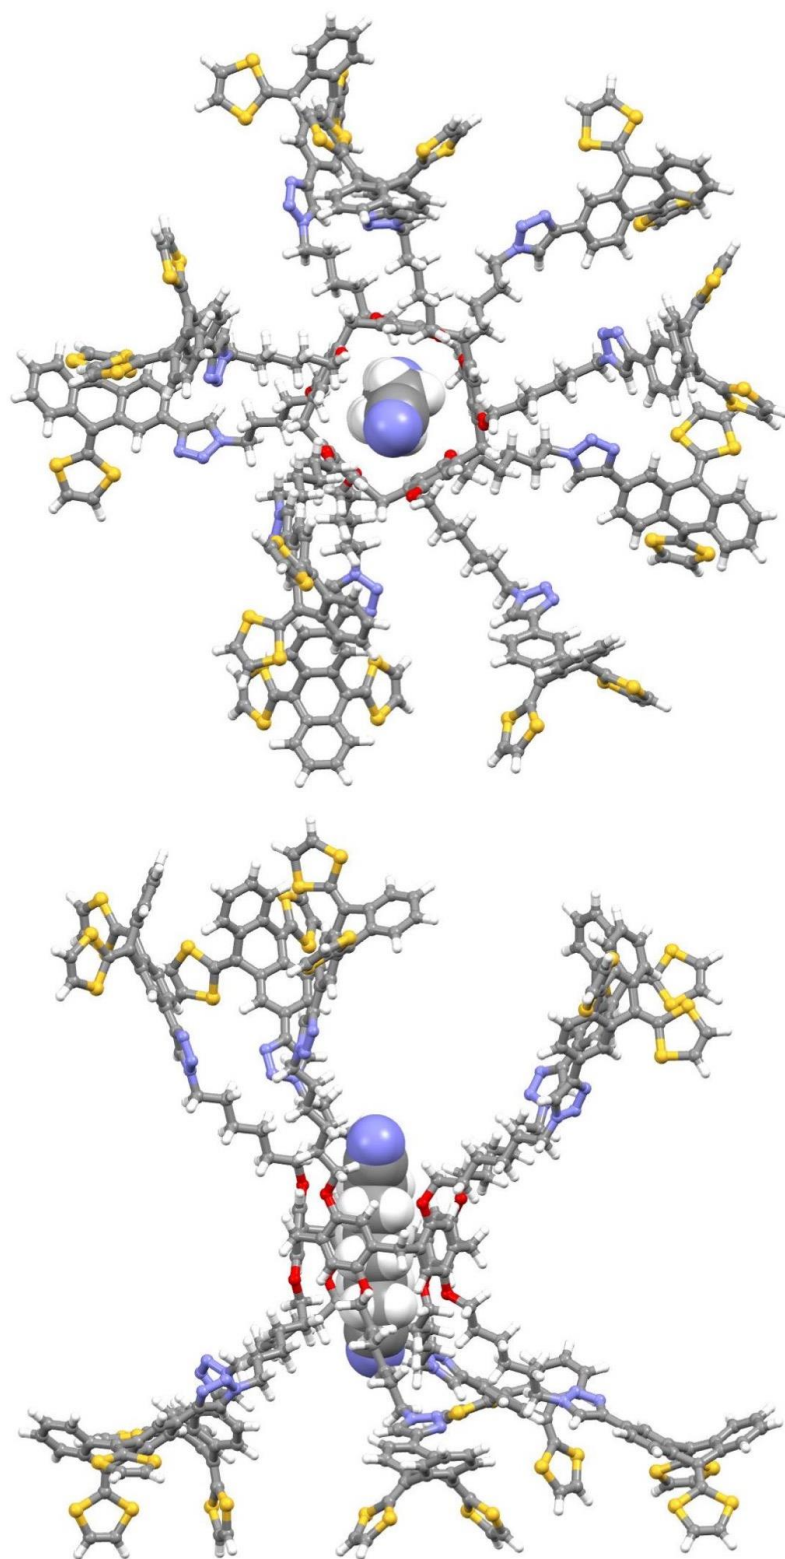

**Fig. S20e.** Top and front views of the calculated structure of inclusion complex [9 ⊂ 7].



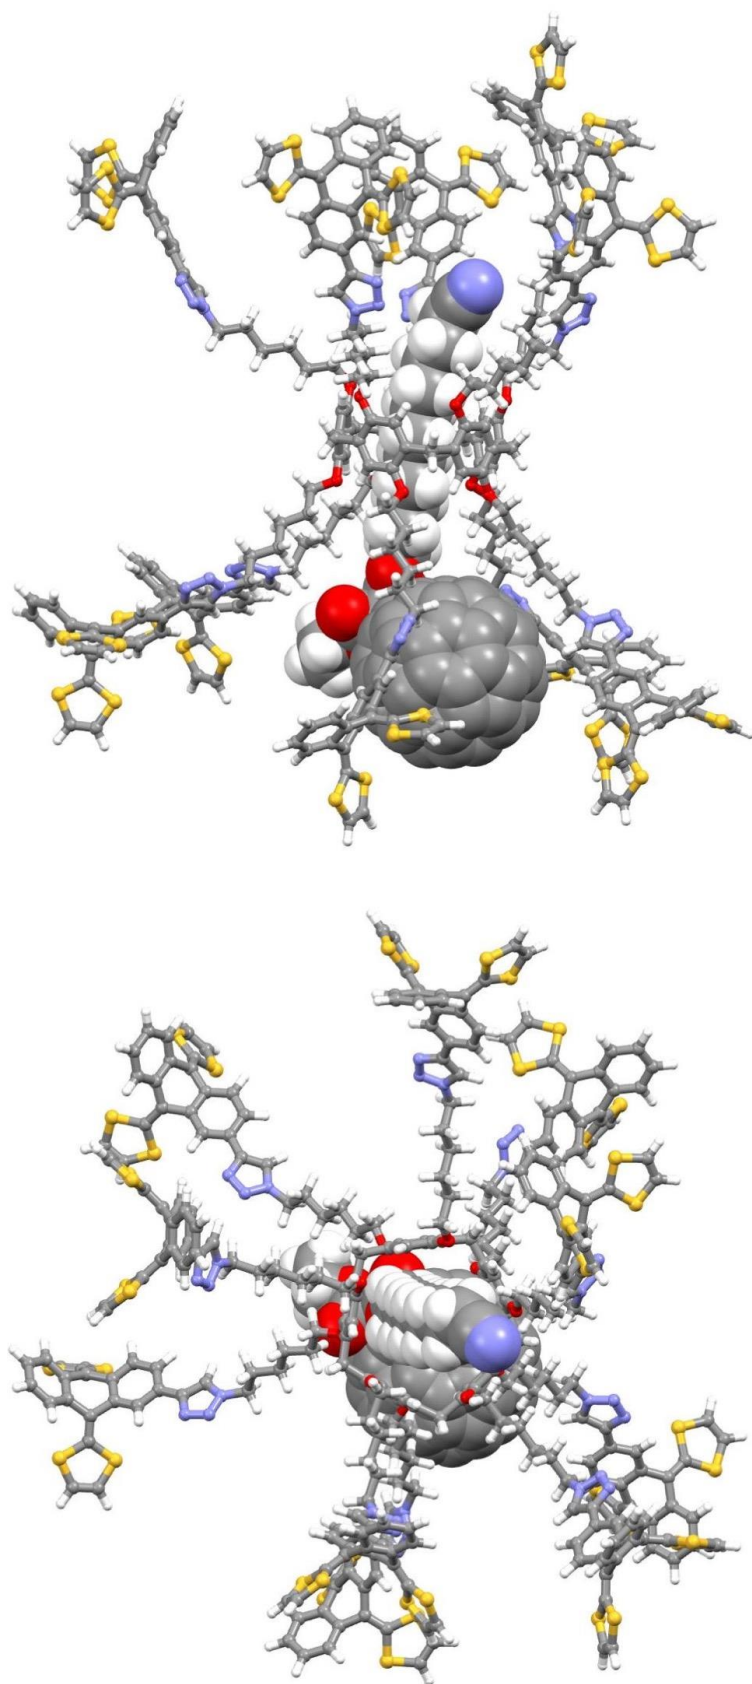

**Fig. S20f.** Front and top views of the calculated structure of inclusion complex [14  $\subset$  7].
